1

2 **Pod and seed trait QTL identification to assist breeding for peanut market**  
3 **preferences**

4

5

6 Carolina Chavarro<sup>\*</sup>, Ye Chu<sup>†</sup>, Corley Holbrook<sup>‡</sup>, Thomas Isleib<sup>§</sup>, David Bertoli<sup>\*</sup>, Ran  
7 Hovav<sup>\*\*</sup>, Christopher Butts<sup>††</sup>, Marshall Lamb<sup>††</sup>, Ronald Sorensen<sup>††</sup>, Scott A. Jackson<sup>\*</sup>,  
8 and Peggy Ozias-Akins<sup>†,††</sup>

9

10 <sup>\*</sup> Center for Applied Genetic Technologies, University of Georgia, Athens, GA 30602,  
11 USA

12 <sup>†</sup> Department of Horticulture and Institute of Plant Breeding, Genetics & Genomics,  
13 University of Georgia, Tifton, GA 31793, USA

14 <sup>‡</sup> USDA- Agricultural Research Service, Crop Genetics and Breeding Research Unit,  
15 Tifton, GA 31793, USA

16 <sup>§</sup> Department of Crop Science, North Carolina State University, P.O. Box 7629, Raleigh,  
17 NC 27695, USA

18 <sup>\*\*</sup> Department of Field and Vegetable Crops, Plant Sciences Institute, ARO (Volcani  
19 Center), Bet Dagan, Israel

20 <sup>††</sup> USDA- Agricultural Research Service, Peanut Research, Dawson, GA 39842, USA

21

22

23

24

25

26 **Running Title:**

27 QTL detection for seed and pod traits

28

29 **Key words:** Peanut, seed, pod, linkage map, QTL, single nucleotide polymorphism

30 (SNP)

31

32

33 ‡ Corresponding author

34 Peggy Ozias-Akins

35 The University of Georgia

36 Department of Horticulture

37 2356 Rainwater Road

38 Tifton, GA 31793

39 [pozias@uga.edu](mailto:pozias@uga.edu)

40

41

42

43

44

45

46

47

48

49

50

## ABSTRACT

51

52

53

54

55

56

57

58

59

60

61

62

63

64

65

66

67

68

69

70

71

72

Although seed and pod traits are important for peanut breeding, little is known about the inheritance of these traits. A recombinant inbred line (RIL) population of 156 lines from a cross of Tifrunner x NC 3033 was genotyped with the Axiom\_Arachis1 SNP array and SSRs to generate a genetic map composed of 1524 markers in 29 linkage groups (LG). The genetic positions of markers were compared with their physical positions on the peanut genome to confirm the validity of the linkage map and explore the distribution of recombination and potential chromosomal rearrangements. These traits were phenotyped over three consecutive years for the purpose of developing trait-associated markers for breeding. Forty-nine QTL were identified in 14 LG for seed size index, kernel percentage, seed weight, pod weight, single-kernel, double-kernel, pod area and pod density. Twenty QTL demonstrated phenotypic variance explained (PVE) greater than 10% and eight more than 20%. Of note, seven of the eight major QTL for pod area, pod weight and seed weight (PVE >20% variance) were attributed to NC 3033 and located in a single linkage group, LG B06\_1. In contrast, the most consistent QTL for kernel percentage were located on A07/B07 and derived from Tifrunner.

73

74

## INTRODUCTION

75

76

77

78

79

80

81

82

83

84

85

86

87

88

89

90

91

92

93

94

95

96

Peanut (*Arachis hypogaea* L.), also referred to as groundnut, is an important legume for human nutrition due to its high levels of protein and oil. It is one of the most important crop legumes in the world with an annual production of 42.9 million metric tons in 2016 (FAO 2017). Seed size and quality are important for breeding and production, thus, a more mechanistic understanding of pod development and seed maturation would benefit the improvement of these traits. During pod development, seed filling plays an important role due to the translocation of organic and inorganic compounds and is an important yield component (Shiraiwa *et al.* 2004; Madani *et al.* 2010; El-Zeadani *et al.* 2014). During seed maturation, the pod filling process is complete when the seeds accumulate nutrients and reach their maximum volume (Mahon and Hobbs 1983; Habekotté 1993; Imsande and Schmidt 1998; Clements *et al.* 2002).

Cultivated peanut is an allotetraploid ( $2n = 4x = 40$ ) with a genome size of 2.7 Gb, approximately the sum of the two diploid A- and B-genome progenitors, *A. duranensis* and *A. ipaensis*, respectively (Samoluk *et al.* 2015). Cultivated peanut was derived from the hybridization of these two diploids (Kochert *et al.* 1996; Fávero *et al.* 2006; Seijo *et al.* 2007; Robledo *et al.* 2009; Robledo and Seijo 2010; Moretzsohn *et al.* 2013; Bertioli *et al.* 2016) that diverged from each other ~2.2 – 3.5 million years ago (Nielen *et al.* 2012; Moretzsohn *et al.* 2013; Bertioli *et al.* 2016). The polyploidization event was very recent, at most ~9-10 thousand years ago (Bertioli *et al.* 2016) which reproductively isolated cultivated peanut from its wild diploid relatives.

This evolutionary history has resulted in low levels of genetic variation (Kochert *et al.* 1991) within tetraploid peanut and high collinearity between the A and B sub-

97 genomes (Moretzsohn *et al.* 2009; Guo *et al.* 2012; Shirasawa *et al.* 2013; Bertoli *et al.*  
98 2016, 2019); thus, gene discovery for breeding is challenging (Stalker and Mozingo  
99 2001; Holbrook *et al.* 2011; Chu *et al.* 2016; Guo *et al.* 2016). Furthermore, the low  
100 polymorphism rates and similarity between the two subgenomes of cultivated peanut  
101 delayed the development and implementation of genotyping tools and the identification  
102 of markers for breeding (Holbrook *et al.* 2011; Shirasawa *et al.* 2012; Koilkonda *et al.*  
103 2012; Clevenger *et al.* 2017). To avoid the challenges of polyploidy and low levels of  
104 polymorphism in cultivated peanut, a few medium density genetic maps of diploid  
105 relatives have been constructed (Nagy *et al.* 2012; Bertoli *et al.* 2014; Leal-Bertoli *et al.*  
106 2015) including consensus maps for the A and B genomes based on wild species  
107 (Shirasawa *et al.* 2013).

108 In the past few years, however, genome sequences for peanut (Bertoli *et al.* 2019)  
109 and its progenitors (Bertoli *et al.* 2016) along with advances in the SNP identification  
110 and detection (Clevenger and Ozias-Akins 2015) have resulted in thousands of SNP  
111 markers (Pandey *et al.* 2017; Clevenger *et al.* 2017, 2018). Mapping with SNP markers  
112 has led to more saturated maps in cultivated peanut with the number of mapped loci  
113 ranging from 772 SNPs to 8,869 SNPs (Zhou *et al.* 2014; Huang *et al.* 2016; Liang *et al.*  
114 2017; Agarwal *et al.* 2018; Wang *et al.* 2018a, 2018b; Liu *et al.* 2019) and QTL  
115 identified reviewed by Ozias-Akins *et al.* (2017).

116 Mapping of seed and pod traits in bi-parental populations has included QTL  
117 analyses for pod and seed length, width, weight and number of seed per pod (Gomez  
118 Selvaraj *et al.* 2009; Fonceka *et al.* 2012; Shirasawa *et al.* 2012; Wu *et al.* 2014; Huang *et*  
119 *al.* 2015; Chen *et al.* 2016a, 2017, 2019; Luo *et al.* 2017, 2018; Wang *et al.* 2019, 2018a)  
120 as well as associations for pod and seed weight, number of seeds and pods per plant

121 (Gomez Selvaraj *et al.* 2009; Ravi *et al.* 2010; Fonceka *et al.* 2012; Shirasawa *et al.* 2012;  
122 Wang *et al.* 2018a, 2019; Chen *et al.* 2019), shelling percentage (Faye *et al.* 2015; Huang  
123 *et al.* 2015; Chen *et al.* 2016a), pod maturity (Liang *et al.* 2009b; Gomez Selvaraj *et al.*  
124 2009; Fonceka *et al.* 2012; Faye *et al.* 2015), and morphological traits such as pod  
125 constriction, thickness or seed coat color (Fonceka *et al.* 2012; Shirasawa *et al.* 2012).  
126 However, none of these studies included pod density as an indicator of pod filling on the  
127 yield components, and most of these studies were limited by the small number of markers  
128 (~220-820 markers) (Liang *et al.* 2009a; Gomez Selvaraj *et al.* 2009; Ravi *et al.* 2010;  
129 Fonceka *et al.* 2012; Huang *et al.* 2015; Chen *et al.* 2016a, 2017; Luo *et al.* 2017, 2018;  
130 Wang *et al.* 2019), except Shirasawa *et al.* (2012) that included 1114 SSRs and, more  
131 recently, Wang *et al.* (2018a) which included 3630 SNPs.

132 In this study, a saturated genetic map was constructed using a set of recombinant  
133 inbred lines (RILs) from a cross of two peanut genotypes, Tifrunner x NC 3033. This  
134 population was phenotyped for seed and pod traits for three consecutive years. While  
135 seed and pod trait QTL have been identified in previous studies, none are associated with  
136 pod filling as a yield component. The hypothesis of this study states that the measurement  
137 of seed and pod traits such as kernel percentage and pod density as a measure of pod  
138 filling along with other traits such as individual pod and seed weight, number of seeds per  
139 pod and 16/64 percentage, a standard measure of the kernel size for commercial purposes  
140 (USDA 1997), will help us to identify novel QTLs and confirm previous QTLs found by  
141 other researchers. As a result, a linkage map including 1524 markers was constructed and  
142 forty-nine QTL were discovered for seed and pod traits, including eight major QTL.  
143 These results will enhance our ability to improve peanut seed quality and yield through  
144 molecular breeding by providing molecular markers for marker assisted selection (MAS).

## 145 MATERIALS AND METHODS

### 146 **Plant material**

147 A set of RILs derived from a cross of Tifrunner x NC 3033 was developed and  
148 roughly half were advanced in Tifton, Georgia and the remainder in Raleigh, North  
149 Carolina (Holbrook *et al.* 2013). NC 3033 (*Arachis hypogaea* L. subsp. *hypogaea* var.  
150 *hypogaea*) (Beute *et al.* 1976; Hammons *et al.* 1981) is a small-seeded Virginia type  
151 germplasm line with incomplete pod filling, while Tifrunner (*Arachis hypogaea* L. subsp.  
152 *hypogaea* var. *hypogaea*), a released cultivar, has more complete pod filling. NC 3033 is  
153 resistant to several diseases including stem rot (*Sclerotium rolfsii* Sacc.) and is one of the  
154 most cylindrocladium black rot (CBR) resistant genotypes identified (Hadley *et al.* 1979).  
155 However, NC 3033 has low seed grades and low % meat as compared to Tifrunner, an  
156 elite runner type characterized by large seeds and good grade (Holbrook and Culbreath  
157 2007) (Fig. 1).

### 158 **Phenotyping of seed and pod traits**

159 The Tifton-derived portion of the RIL population was planted for three  
160 consecutive years in Tifton, GA (USA) and phenotyping was conducted for 134 F<sub>6:8</sub> RILs  
161 in 2013, 152 F<sub>6:9</sub> RILs in 2014 and 160 F<sub>6:10</sub> RILs in 2015 using a randomized complete  
162 block experimental design with three replicates and a plot size of 1.5 m x 1.8 m. For all  
163 years, 16/64 percentage (16/64P) as seed size index and kernel percentage (KP), also  
164 known as shelling percentage, were obtained using a BestRay X-ray grading machine.  
165 16/64P is the percentage by weight of seeds that fall through a 16/64 x 3/4 in screen  
166 retaining seeds with size of interest. KP and 16/64P are calculated as proportion of the  
167 sum of kernel weight and hull weight for 100 pods.

168 In 2014 and 2015, a subset (250 g of pods) was selected for each RIL to  
169 determine the variation in pod filling through phenotyping of individual pods. The pods  
170 were dried to approximately 10% moisture and then classified and counted based on the  
171 number of seeds per pod in single- (SP), double- (DP) and triple-kernel pods (TP). Due to  
172 a low number of triple-kernel pods found in only a few individuals, this trait was not used  
173 for the QTL analysis since the data was not transformable to follow a normal distribution.  
174 Subsequently, 10 randomly-selected double-kernel pods per line and replicate were  
175 shelled and the maturity was judged by the internal pericarp color (IPC) (Gilman and  
176 Smith 1977). The weight of the entire pod including the shell and the kernels was  
177 recorded (PW) and the weight of the two kernels was recorded (SdW) using the LabX  
178 Balance Direct 3.2 software and a digital scale. Ten half pods per line per replicate were  
179 scanned on both sides and analyzed using ImageJ (Rasband 2011) to determine pod area  
180 (PA) as a surrogate for pod volume according to Wu et al. (2015). The pod density (PD)  
181 (pod density = pod weight / pod area mm<sup>2</sup>) was calculated for the samples as a measure  
182 of pod filling.

### 183 **Statistical analysis**

184 For all the phenotypic traits, Shapiro-Wilk and Anderson-Darling tests for  
185 normality of distribution were performed. When the data did not fit a normal distribution,  
186 outliers were removed and the data were transformed (e.g. logarithmic, square root or  
187 reciprocal values). Correlation coefficients between all the traits across years for the  
188 parents were calculated using Minitab 17 (Minitab® 17 Statistical Software 2010).  
189 Histograms, boxplots and analysis of variance for all the traits and years were plotted  
190 using R. Two-way ANOVAs for all the traits were made following the linear model  
191 method in R to identify significant differences between RILs, blocks and the interaction



192 between RILs x years. Following the same model, broad sense heritability was  
193 determined by calculating (SS RIL) / (SS model – SS block), where SS corresponds to  
194 the sum of squares. To diminish the block effect for the analysis of variance, the year  
195 effect was calculated in a separate model including only year effects.

## 196 **Genotyping and map construction**

197 The parents, Tifrunner and NC 3033, were included in a panel of genotypes  
198 sequenced by whole genome re-sequencing to identify the SNPs for the Affymetrix  
199 Axiom\_Arachis SNP array containing 58,233 SNPs (Pandey *et al.* 2017; Clevenger *et al.*  
200 2017). DNA of the parents and a set of 165 F<sub>6:7</sub> RILs of the population planted in Tifton  
201 was extracted using the Qiagen DNeasy Plant mini kit® and sent to Affymetrix for  
202 genotyping. SNP calls were curated using the Axiom Analysis Suite Software® (Thermo  
203 Fisher Scientific Inc. 2016) based on the clustering of data for the entire population and  
204 the parents. Also included were 111 fluorescence tagged SSRs (Guo *et al.* 2012),  
205 previously used to genotype this population.

206 All RILs were checked for segregation distortion using a  $\chi^2$  test and an expected  
207 1:1 segregation ratio. Markers and RILs with more than 10% missing data were removed  
208 as well as the RILs with more than 20% heterozygote calls. A genetic map was  
209 constructed using JoinMap v4.1 (Van Ooijen 2006) with a minimum LOD of 3.0 and the  
210 Kosambi function. A graphical representation of the map was constructed using Mapchart  
211 v2.3 (Voorrips *et al.* 2002).

212 Linkage groups were identified and named based on the pseudomolecules of the  
213 tetraploid *A. hypogaea* genome cv. Tifrunner (Bertioli *et al.* 2019; <http://peanutbase.org>).  
214 Marker locations were compared to SNP sequence positions on the pseudomolecules of  
215 the two ancestral diploid genomes (Bertioli *et al.* 2016; Clevenger *et al.* 2017).

216 Confirmation of the loci positions was done manually and by BLASTN ( $e$  value  $< 1 \times$   
217  $10^{-10}$ ) of the SNP flanking sequences to the tetraploid reference genome, using an  
218 identity greater than 90%, alignment greater than 80% and fewer than three mismatches.

### 219 **QTL analysis**

220 The normalized and average values from the three replicates of the phenotypic  
221 traits per year were used for QTL identification (File S1). Composite Interval Mapping  
222 was performed using WinQTL Cartographer v2.5\_011 (Wang *et al.* 2012). The statistical  
223 significance of the QTL effects was determined using 1000 permutations with a 0.05  
224 significance level. A graphical version of the map with QTL was constructed using  
225 Mapchart v2.3 (Voorrips *et al.* 2002). Naming of QTL follows the nomenclature of “q”  
226 as QTL, followed by the abbreviation of the trait, the last two digits of the year and the  
227 consecutive number of the QTL for that specific trait. The markers flanking the QTL  
228 were used to obtain the physical position from the *A. hypogaea* genome.

229 QTL were compared with previously reported QTL for seed and pod traits, based  
230 on physical and genetic locations. The flanking sequences of the markers linked to QTL  
231 or the fragment sequence of the QTL regions related to seed, pod and yield traits reported  
232 by Gomez Selvaraj *et al.* (2009), Fonceka *et al.* (2012), Chen *et al.* (2016a, 2019), Luo *et*  
233 *al.* (2018) and Wang *et al.* (2018a) were extracted from the two diploid progenitors.  
234 BLASTN was performed with  $e$ -value  $1e^{-10}$ , gap open 5, gap extend 2, penalty -2,  
235 against the *A. hypogaea* genome sequence. The first hit was taken for comparison of LG  
236 and position. The position of the hit was compared with the position of the QTL reported  
237 in this study to determine possible overlap. In addition, comparisons were made with the  
238 integrated QTL described by Chen *et al.* (2017), based on the reported physical position

239 on the diploid genome progenitors and compared to the physical position of the QTL in  
240 this study, also based on the diploid genomes following the same BLASTN parameters.

#### 241 **Data availability**

242 The phenotypic information, the linkage map information and the genotyping  
243 used for map construction are described in Supporting Information, File S1. The  
244 phenotypic information includes the measurement and transformation method. The  
245 linkage map information and genotyping include the genetic and physical positions of the  
246 markers plus the GenBank accession ID for the SSRs available. Table S1 describes the  
247 previous QTL identified in cultivated peanut used in this study for comparison.

## 248 **RESULTS**

### 249 **Seed and pod phenotypes in the RIL population**

250 NC 3033, although a small-seeded Virginia type peanut with incomplete pod  
251 filling (e.g. R7 stage (Boote 1982) in Fig. 1), has larger seeds than Tifrunner. Phenotypic  
252 data of the parents and the RIL population were collected over three years using a  
253 randomized complete block design (Table 1). We observed a large block effect in 2015  
254 that can be attributed to moisture (rain) after harvest where two replicates (2 and 3) were  
255 infested with mold that affected pod weight and density (Fig. 2). For most of the  
256 phenotypic data, we were able to obtain normal distributions (Fig. 3).

257 The two parents contrasted for traits, Tifrunner was higher for KP, 16/64P, DP  
258 and PD, whereas, NC 3033 was higher for SdW, PW and PA. The population exhibited  
259 variation for all traits (Fig. 3), suitable for statistical and QTL analysis. Based on the  
260 analysis of variance and the boxplots for all the RILs by blocks (replicates) in all the  
261 years, we found block effects (Fig. 2), especially for 16/64P and KP in 2014 and 2015,

262 SP and PA in 2014, and SdW and PD in 2015. Analysis of variance of all traits revealed  
263 significant differences between RILs and between years except for SP and PA, and the  
264 year x RIL interaction except for SP where there was no significant difference (Table 2).  
265 The broad sense heritability ranged from 61.3% to 80.3% for most of the traits, except for  
266 SP with a value of 40.4%, indicating a genetic component underlying these traits in this  
267 population (Table 2).

268 Pearson correlations between traits (Fig. 4) were, as expected, mostly correlated,  
269 particularly for traits such as SdW, PW, PA and PD. Some traits had negative  
270 correlations such as 16/64P with KP, SdW, PW, PA and PD, also expected. In addition,  
271 SP was negatively correlated with KP, SdW, PW and PA, and DP negatively correlated  
272 with PW, SdW, PA, KP and PD in 2014-2015. There was some year to year variation as  
273 in 2013 KP was not correlated with other traits such as PW, DP, PA and PD in 2014-  
274 2015.

### 275 **Linkage map and comparison with physical map**

276 Genotyping of Tifrunner x NC 3033 RILs resulted in 2,233 polymorphic SNPs.  
277 After filtering for missing data and heterozygous calls, 1,998 SNPs and 100 SSRs were  
278 retained and a genetic map was constructed using the 156 selected RILs. The total map  
279 size spanned 3382.0 cM containing 1524 markers (1451 SNPs and 73 SSRs) assigned to  
280 29 linkage groups (Fig. 5 and Table 3); 10 were from the A genome, 13 from the B  
281 genome and 6 were A and B markers combined. The 29 linkage groups ranged in size  
282 from A04 covering 298.7 cM to A08\_B08 with 4.5 cM total with an average number of  
283 loci per linkage group of 53 ranging up to 133 loci in A04. The average distance between  
284 neighboring markers was 2.7 cM, ranging from 1.0 cM in B06\_2 to 6.2 cM in B03.

285           The names of the linkage groups were assigned based on the assignment of SNPs  
286 to the sequence-based pseudomolecules. If more than 51% of the markers were assigned  
287 to a specific chromosome it was given that name. In cases where the group contained ~  
288 50% of loci from two chromosomes, the name included both chromosomes. Most linkage  
289 groups included markers from homoeologous chromosomes, however, two had markers  
290 from different chromosomes, A07\_B08 and A10\_B04 with 7 and 73 markers,  
291 respectively.

292           1,269 loci were successfully aligned to the *A. hypogaea* pseudomolecules  
293 spanning a total physical distance of 2008.13 Mbp and an average physical interval of  
294 2.26 Mbp between loci (Table 3 and Fig. 6). The percentage of pseudomolecules covered  
295 by linkage maps varied, two groups covered more than 80% of the pseudomolecule, 12  
296 groups more than 90% of which three were close to 100%, e.g. A04, A05\_B05 and B09.  
297 The average recombination rate was 0.93 cM/Mbp and A08 had the maximum rate. A10,  
298 B05, B08\_2 and A03\_2 had the lowest recombination rates.

299           From the distribution of the loci along the chromosomes (Fig. 6) we observed  
300 higher marker saturation and increased recombination in the arms and lower marker  
301 saturation and recombination frequencies in the pericentromeric regions. Most of the  
302 linkage groups with good correspondence to a pseudomolecule were symmetrical, that is  
303 arms with dense markers and a pericentromeric region with few markers and reduced  
304 recombination. A few linkage groups exhibited rearrangements such as A01 and B03  
305 where there is an apparent inversion on the top arm. Even though the marker density was  
306 low, there was a correspondence between loci from the group A07\_B08 with the A07  
307 pseudomolecule, as suggested previously (Bertioli *et al.* 2016).

308

## 309 **QTL identification**

310 For seed and pod phenotypes, we identified 49 QTL on 14 linkage groups (Table  
311 4 and Fig. 7). Most linkage groups had only one or two QTL, with a maximum of 14  
312 QTL in A04, 11 QTL in A07\_B07 and 10 QTL in B06\_1. QTL were identified for all  
313 traits (16/64P, KP, PW, SdW, SP, DP, PA and PD) across all years, except for 16/64P in  
314 2014 and 2015, and the QTL explained 5.3% to 31.4% of the phenotypic variation (Table  
315 4). Eight QTL were major, explaining > 20% of the phenotypic variation, and 12 QTL  
316 had effects ranging between 10-20%. NC 3033 contributed most, 6 of 8, of the major  
317 QTL, all on B06\_1, accounting for 24.4% - 31.4% of phenotypic variation. Tifrunner  
318 contributed two major QTL on B06\_1 and A07\_B07 corresponding to 28.4% and 29.2%  
319 of the phenotypic variation, respectively. Seven of the major QTL were associated with  
320 just two SNP markers, AX-147226319\_A06 and AX-147226313\_A06, that are 3.3 cM  
321 apart. These QTL were detected for four traits, PW, SdW, PA and DP, for years 2014 and  
322 2015. The first three QTL were contributed by NC 3033 and had high positive  
323 correlations (Fig. 4), but were all negatively correlated with DP, contributed by  
324 Tifrunner. One QTL (*qDPA07\_B07.2*) was located on A07\_B07 (Table 4).

325 KP had the most QTL, 9 over all three years, 8 were contributed by Tifrunner and  
326 one from NC 3033. NC 3033 contributed seven of nine SP QTL, three of them in A04.  
327 For PA, five of nine QTL were contributed by NC 3033. Seven QTL were identified for  
328 SdW with two major QTL on B06\_1 provided by NC 3033 explaining 25.9% and 31.45%  
329 of the phenotypic variation. Six and four QTL were identified for PW and DP,  
330 respectively, on B06\_1 with large effects (17.0% - 29.2%). For 16/64P, three QTL were  
331 found, two from Tifrunner on chromosomes A02 and A06, and one on A10\_B04 from

332 NC 3033. Finally, four QTL were found for PD, one from NC 3033 on A03\_B03 and  
333 three from Tifrunner on A09, A04 and B06\_1.

### 334 **Genomic positions and co-localization of QTL**

335 The genetic positions of QTL in cM correspond to the end points where peaks  
336 exceeded statistical thresholds based on permutation tests. The approximate physical  
337 positions of the QTL were defined as the closest flanking genetic markers (Table 4). The  
338 average genetic distance spanned by the QTL was 15 cM corresponding to an average of  
339 4.76 Mbp physical distance, though some ranged up to 50.3 Mbp. We observed that some  
340 QTL spanned similar genetic regions, in particular those on A04, A07\_B07, B06\_1 and  
341 B09 (Table 5).

342 We observed extensive clustering of QTL, as might be expected given the traits  
343 and correlations. On A04, three groups of QTL were co-localized, two of them  
344 overlapping between them. The first group included two QTL for SP, the second group  
345 two for PA, and the third group included 8 QTL: three for PW, three for SdW, and one  
346 each for DP and PA (Table 5). There are 220, 53, and 107 annotated genes within the  
347 physical regions spanned by the QTL, respectively. On A07\_B07, another three QTL  
348 groups overlapped: the first group included two QTL each for PW and SdW; the second  
349 group included three QTL for KP and one for DP and PW, and the third group included  
350 two QTL for KP. There were several common markers in the QTL regions for groups two  
351 and three as these two groups overlapped by about 10 cM. The first group spanned 56  
352 genes and the second and third more than 46 genes (Table 5). Other QTL clusters were  
353 observed, including those on linkage groups B06\_1 and B09.

354 Co-localization of QTL and correlation of traits may be explained by pleiotropic  
355 effects for pod and seed phenotypes. There was, as expected, a high correlation in the

356 behavior of the same traits across different years, confirmed by co-localization of QTL.  
357 Some QTL were both co-localized and highly correlated with other traits such as for PW,  
358 SdW and PA on A04, PA and SdW on A07\_B07, and PA, PW and SdW on B06\_1.

### 359 **Comparison with previously reported QTL**

360 The physical locations of the QTL found in this research were compared with  
361 previous QTL studies for seed and pod traits by Chen et al. (2016a, 2017, 2019), Fonceka  
362 et al. (2012), Gomez Selvaraj et al. (2009), Wang et al. (2018a) and Luo et al. (2018)  
363 (Table 6 and S1). For 81 QTL from these seven studies, we were able to find either the  
364 marker sequences (Gomez Selvaraj *et al.* 2009; Fonceka *et al.* 2012; Chen *et al.* 2016a,  
365 2017; Luo *et al.* 2018), or the sequence of the entire QTL from the two diploid  
366 progenitors (Wang *et al.* 2018a; Chen *et al.* 2019) and determined their positions by  
367 sequence alignment using BLAST to the reference genome.

368 After the comparison with the QTL regions from previous studies, we found 11  
369 QTL in close proximity (0.08 Mbp – 5.24 Mbp) on chromosomes A02, A03, A04, A05,  
370 A07, A09 and B06 and 6 QTL co-localizing in A07, A10, B06 and B10 (Table 6). No  
371 overlapping QTL were found for Selvaraj et al. (2009), but one from Fonceka et al.  
372 (2012), Chen et al. (2017), Chen et al. (2019), Luo et al (2018) and six from Wang et al.  
373 (2018) were found in close proximity to QTL from this study.

374 In comparison to Chen et al. (2016), one of our QTL co-localized with theirs at  
375 80.28 Mbp of A10, which is close to the QTL flanking marker GM2084 (Genebank ID  
376 GO263349.1). In A07, the QTL cluster found by Luo et al. (2018) which included 12  
377 QTL, co-localized with the QTL cluster found in this study around 0.63 – 1.03 Mbp  
378 linked to the marker AHGS1836 (Genebank ID\_DH965050.1). Furthermore, four co-  
379 localizing regions were found after the comparison with the QTL discovered by Wang et



380 al. (2018a), three of them at the bottom of the chromosome B06 (130.49 - 146.39 Mbp)  
381 and one in B09, including some QTL clusters (Table 6).

382 Due to the use of common markers, Chen et al. (2017) identified a group of  
383 unique QTL based on a comparison with previous studies (Gomez Selvaraj *et al.* 2009;  
384 Fonceka *et al.* 2012; Shirasawa *et al.* 2013; Pandey *et al.* 2014; Huang *et al.* 2015; Chen  
385 *et al.* 2016a, 2016b). After comparing the QTL from this research with the unique QTL  
386 reported by Chen et al. (2017), there was no evidence of overlapping QTL. However,  
387 there were some in close proximity (between 1Mbp - 4.8 Mbp) in the diploid genomes in  
388 chromosomes A02, B01 and B06.

## 389 DISCUSSION

390 Approximately 3% of the markers on the SNP array were polymorphic in this  
391 population, reinforcing the observation that peanut has very low levels of sequence  
392 variation (Varshney *et al.* 2009; Hong *et al.* 2010; Chen *et al.* 2016a). As with other  
393 peanut studies, we had a high number of false positives in SNP calling due to the  
394 similarity between subgenomes (Clevenger *et al.* 2015, 2017; Clevenger and Ozias-Akins  
395 2015). Thus, the low genetic polymorphism rate and genomic composition still thwart our  
396 ability to obtain high-quality, high-density maps obtained in other species. However, in  
397 comparison to previous studies, the number of markers in this map is quite high (Bertioli  
398 *et al.* 2014; Huang *et al.* 2016; Liang *et al.* 2017; Liu *et al.* 2019) and the distribution of  
399 the markers as compared to their physical positions in the tetraploid genome indicates  
400 reasonable coverage for QTL identification. Our map included 1,524 markers covering a  
401 map distance of 3,382 cM. The other five ‘high-density’ maps in peanut include 1,621  
402 SNPs and 64 SSRs covering 1,446.7 cM (Zhou *et al.* 2014), 2,187 SNPs spanning  
403 1,566.10 cM (Wang *et al.* 2018b), 3,630 SNPs covering 2,098.14 cM (Wang *et al.*

404 2018a), 3,693 markers in a consensus map spanning 2,651 cM (Shirasawa *et al.* 2013),  
405 and 8,869 SNPs (after whole genome population re-sequencing at 2x-5x coverage) with a  
406 map length of 3,120 cM (Agarwal *et al.* 2018).

407 Most of the SNPs were concordant with physical positions on the  
408 pseudomolecules, per their design (Pandey *et al.* 2017; Clevenger *et al.* 2017) and  
409 confirmed by sequence alignment after genetic mapping. For most linkage groups, it was  
410 possible to distinguish individual A and B genome chromosomes. However, there were  
411 six linkage groups (A03\_B03, A05\_B05, A07\_B07, A08\_B08, A07\_B08 and A10\_B04)  
412 where about 50% of the markers were assigned to the other sub-genome making it  
413 difficult to distinguish the A and B genome chromosomes. This is due to the high  
414 sequence similarity and collinearity between the A and B genomes and the low genetic  
415 diversity between them, due to a recent diversification of the two diploid progenitors  
416 (Bertioli *et al.* 2016).

417 Markers from A07 and B08 were in one linkage group corresponding to what  
418 Bertioli *et al.* (2016) described as a reciprocal translocation. A07 has a high repetitive  
419 content with only one euchromatic arm and A08 is a diminutive chromosome with high  
420 gene density (Bertioli *et al.* 2016). Thus, the physical composition of the chromosomes,  
421 and chromosome interchanges, may have played a role in the collapse of the genetic  
422 maps of these two groups as demonstrated by large syntenic blocks shared between A07  
423 – B08 and B07 – A08.

424 Linkage maps were consistent with the new tetraploid sequences (Fig. 6) (Bertioli  
425 *et al.* 2019), which showed large inversions relative to the diploid genomes on A01, B01,  
426 B03 and B04 (Fig. 6). Bertioli *et al.* (2016) also found large inversions in both arms of  
427 chromosomes A01 and B01, and an apparent inversion in A05 as compared to the diploid

428 reference genomes, also found by Wang et al. (2018a). These inversions were observed  
429 as an arc or a perpendicular line relative to the rest of the markers in a linkage group (e.g.  
430 A01 in Fig. 6), and in most cases, at the ends of the chromosome arms. These inversions  
431 likely drive DNA loss and/or gain through recombination-driven deletions that lead to  
432 DNA gain in non-recombinogenic regions (Bennetzen *et al.* 2005; Tian *et al.* 2009;  
433 Bertoli *et al.* 2016).

434         Although linkage groups did show some fragmentation compared to the  
435 chromosomal sequences, the markers were reasonably well distributed across the  
436 genome, based on genetic to physical distances and number per linkage group. Similar to  
437 other species, the pericentromeric regions were depauperate for markers and had low  
438 recombination rates (Jensen-Seaman *et al.* 2004; Sharma *et al.* 2013).

439         All the selected phenotypic traits demonstrated transgressive segregation, with  
440 some RILs showing extreme phenotypes and exceeding the performance of the parents,  
441 such as RILs PR F6:7\_600, PR F6:7\_620, PR F6:7\_62, etc. (Table S2). Furthermore, the  
442 high broad sense heritability for all traits except DP indicated a major genetic component.  
443 Based on these observations, we inferred that this population was suitable for genetically  
444 dissecting seed and pod traits as a prelude to contributing to yield improvement.

445         In contrast to previous studies (Table S1), we used PD as a measurement for seed  
446 and pod filling and measured PA and PD based on methods described in Wu et al. (2015)  
447 in order to identify loci associated with these traits and to find correlations with traits  
448 measured in previous work. PD and PA had relatively low positive correlations  
449 demonstrating that large pods are not always associated with either larger seeds or higher  
450 yields. These results were expected as NC 3033 has larger pods than Tifrunner but has  
451 incomplete pod fill.

452 It was previously observed that large pods may be correlated with thick pericarp  
453 in peanut which complicates selection for large pods with large and dense seeds  
454 (Hammons 1973; de Godoy and Norden 1981; Venuprasad *et al.* 2011; Wu *et al.* 2015),  
455 and it was noted that the thickness of pods is highly correlated with pod maturity  
456 (Williams *et al.* 1987). This supports our finding of QTL co-localized on A07 for KP  
457 with previously mapped percentage of pod maturity (Fonceka *et al.* 2012). This  
458 demonstrates that maturity can be indirectly measured and that our population is likely  
459 segregating for maturity, since both parents of the population have different maturity  
460 ranges, Tifrunner being a late maturity peanut with ~150 days after planting (Holbrook  
461 and Culbreath 2007) and NC 3033 with an earlier maturity of ~135 days after planting  
462 (Beute *et al.* 1976; Korani *et al.* 2018). At the time of harvest, when seed and pod filling  
463 is complete and the seeds have accumulated storage products, the seed density is higher  
464 than in immature seeds (Williams *et al.* 1987; Sanders 1989; Rucker *et al.* 1994b). This is  
465 supported by high positive correlations of PD and PA with SdW and PW, demonstrating  
466 that it is possible to have larger pods and larger seeds. These results are also supported by  
467 Rucker *et al.* (Rucker *et al.* 1994a) showing that pods with mature kernels have  
468 significantly greater density. Although the population was segregating for duration of  
469 maturity, pod maturity was measured by the inner pericarp color to select samples for PW  
470 and SdW to calculate PA and PD and also to contrast the values with KP. In addition, we  
471 assumed there were no confounding effects with KP, since the correlations between KP  
472 vs SdW, PW, PA and PD were very low, and we could see an indirect measure of  
473 maturity from these traits.

474 On the other hand, PD and PA were negatively correlated with 16/64P, SP and  
475 DP, indicating that the larger pods with higher density had a smaller percentage of seeds

476 passing through the screen. Tifrunner is a large-seeded runner type and NC 3033 a small-  
477 seeded Virginia type (Fig. 1). Regarding the negative correlation of PD and PA with SP  
478 and DP, this indicates that greater pod area and density are associated with lower pod  
479 count per standard sample weight, regardless of number of seeds in the pods. This  
480 corresponds to the co-localized QTL found for seed and pod weight vs single and double  
481 pods (Table 4, Fig. 4a).

482 This observation contrasts with work in *Arabidopsis*, however, where Gnan et al.  
483 (2014) found that seed number evolved independently from seed size due to a non-  
484 overlapping QTL found in a multiparental population, although natural variation is  
485 observed within the species. There are other studies corroborating the trade-off between  
486 seed size and seed number in crops when there are sufficient resources available at the  
487 time of seed set (Gambín and Borrás 2009). Furthermore, a correlation between seed  
488 number and the duration of seed filling period was observed (Kantolic and Slafer 2007)  
489 concordant with our findings that the population is likely segregating for maturity. Even  
490 though Tifrunner and NC 3033 are both characterized by double kernels, the population  
491 segregated for the number of seeds per pod with both single and double-kernel at a ratio  
492 of 1:4 single to double-kernel. This may also be explained, in part, by segregation for  
493 maturity in the population, related to the pod and seed filling period (Clarke 1979;  
494 Rucker *et al.* 1994b, 1994a; Kantolic and Slafer 2007; Gambín and Borrás 2009).

495 Regarding the distribution of QTL, Fonceka et al. (2012) identified 15 QTL on  
496 LG A07 and 17 QTL on B02 and B06, all for yield, seed and pod traits, with large  
497 phenotypic effects ranging from 8.7% to 26%, similar to this study. Wang et al. (2018a)  
498 found most of the QTL related to yield traits at the ends of B06 and B07 with phenotypic

499 variation ranging from 4.30 - 18.99%, with six co-localized QTL in close proximity with  
500 QTL found in this study on B06 (Table 6).

501         Consequently, QTL related to seed and pod size and weight were concentrated on  
502 three linkage groups. This follows previous work suggesting that alleles from QTL for  
503 seed and pod size are clustered in A07, B02 and B06 due to domestication (Fonceka *et al.*  
504 2012). Also, the seven QTL found in B06 confirmed previous studies, mainly the QTL  
505 found by Wang *et al.* (2018), which found pleiotropic QTL at the end of the B06  
506 chromosome and found candidate genes associated with yield traits, some of them related  
507 to embryo development. These findings demonstrate the consistency of QTL across  
508 different genetic backgrounds and the potential for marker assisted selection of desirable  
509 seed and pod traits.

510         Of the 49 QTL identified, 33 co-localized with either the same trait in another  
511 year and/or with other traits in the same or different years. The regularity of the QTL  
512 discovered in the same linkage group locations across the years, the co-localization with  
513 previous studies, and the high phenotypic variance (Table 4, Table 5, Table 6) indicates  
514 the reliability of these QTL. Although the regions covered by the QTL are still large in  
515 physical distance, we were able to better elucidate the location of these QTL, including  
516 annotated genes in these regions that can be used to develop additional markers. Others  
517 have observed correlations between QTL regions with differentially expressed candidate  
518 genes, and it has been suggested that overlapping QTL might share common biochemical  
519 pathways (Schweizer and Stein 2011; Kocmarek *et al.* 2015); indeed many of the QTL in  
520 this study were correlated. Only a few QTL did not co-localize with others, even ones  
521 with high correlations, such as 16/64P and PD with  $r > 0.7$ .

522 In summary, we found new seed and pod QTL and validated QTL found in other  
523 populations. This provides additional tools for marker-assisted breeding to advance  
524 peanut improvement and for eventual molecular characterization of these economically  
525 important traits. Additional mapping is needed to further delineate the candidate genomic  
526 regions and find the genes causal to the phenotypic variation, and to pyramid the  
527 genes/QTL for superior genotypes. Marker assisted selection is in progress in peanut,  
528 currently used for only a few traits (Ozias-Akins *et al.* 2017); however, these QTL can  
529 expand the molecular breeding toolbox for peanut in order to improve the yield and  
530 quality of the peanut crop. To that end, marker-trait associations need to be further  
531 refined and validated in other breeding populations.

532

### 533 **Author contributions**

534 Conceived and designed the experiments: POA, CCH, RH, SAJ. Population  
535 design: CCH, TGI. Performed the experiments: CC, YC, CCH. X-Ray measurements:  
536 CB, ML. Data analysis: CC, YC, DB. Writing/editing: CC, SAJ, POA, CCH.

### 537 **Acknowledgements**

538 This work was supported by funding from the US-Israel Binational Agricultural  
539 Research and Development Fund (BARD IS-4540-12 to POA, RH and SAJ). We thank  
540 Jenny Leverett, Eric Antepencko, Caitlynn Schneider, Emma Matthews, James Watkins,  
541 Sirjan Sapkota, and Katherine Willard for their help with seed and pod phenotyping. We  
542 thank Shannon Atkinson, Jason Golden, Betty Tyler for the field work and X-Ray  
543 measurements in Tifton. We also thank Stephanie Botton and Kathleen Marasigan for  
544 their help with DNA extractions. We are additionally grateful to Jason Wallace and

545 Chunming Xu for advice on statistical analysis and Soraya Bertioli, Chung-Jui Tsai and

546 Ali Moussaoui for reviewing an early version of the manuscript.

547

548

549

550

551

552

553



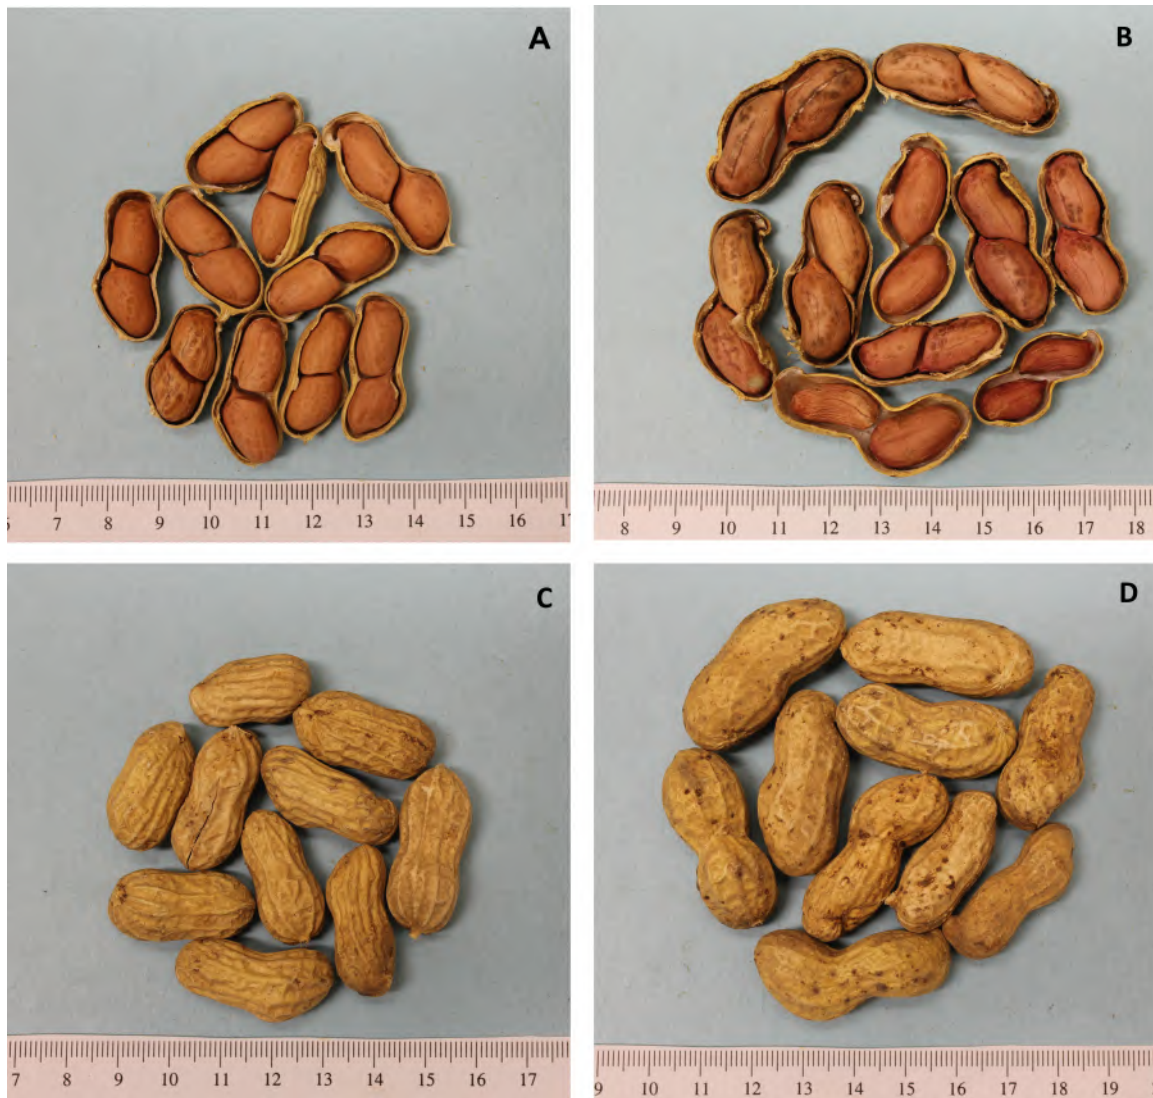

554

555 **Figure 1.** Seeds and pods from Tifrunner and NC 3033. **A, C.** Tifrunner, a commercial  
556 runner type in seed and pod size showing complete pod-filling. Note the proximity from  
557 the seeds to the border of the pods, which is a desirable commercial trait. **B, D.** NC 3033,  
558 a small seeded Virginia type showing incomplete pod-filling. Note how the seeds are  
559 loose and do not reach the border of the pods.

560

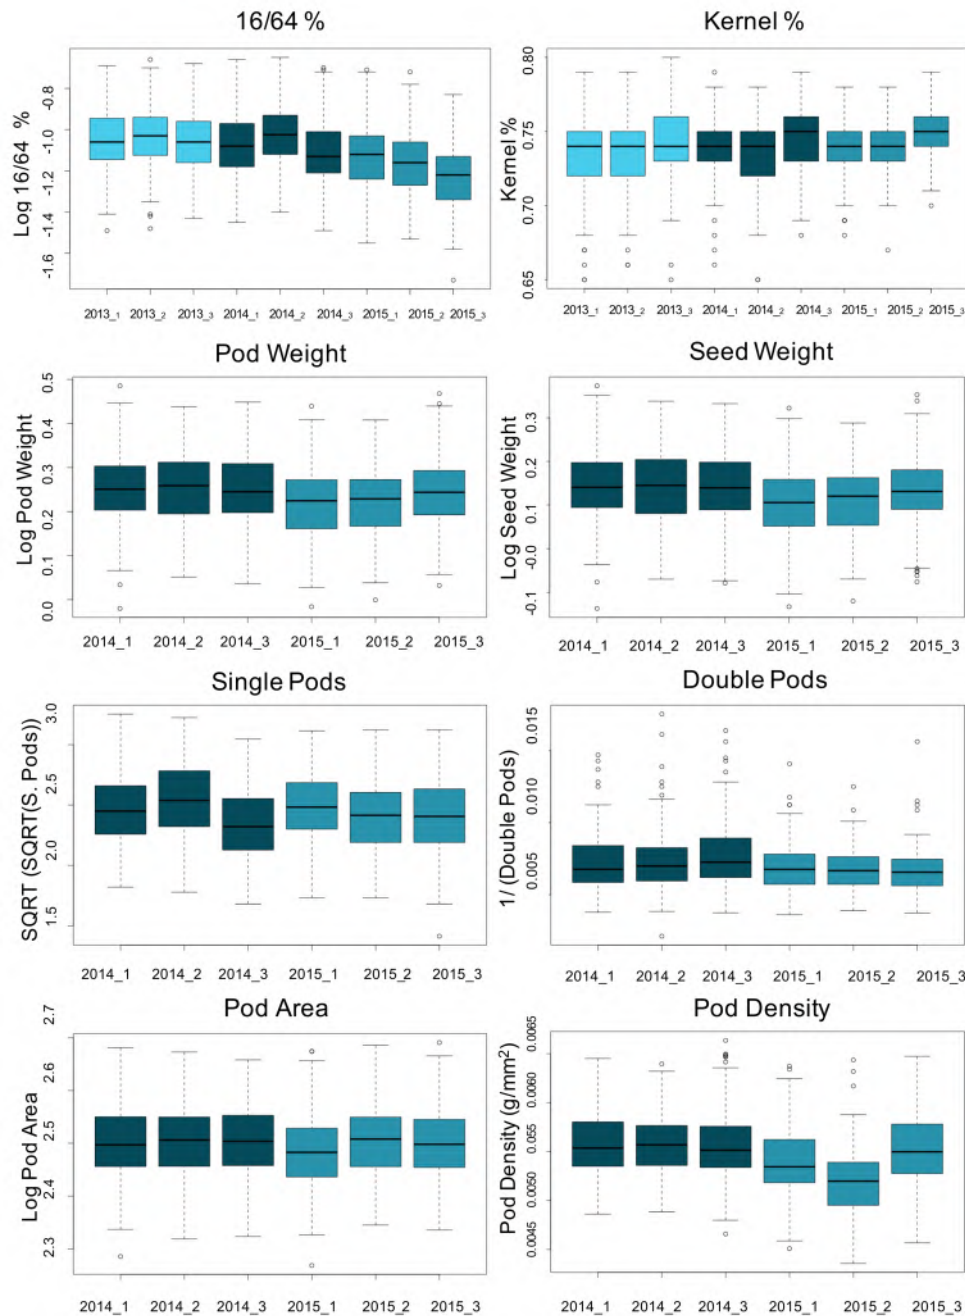

561

562 **Figure 2.** Boxplots for seed and pod traits across years, blocks and replicates within  
563 years, based on the normalized data. y-axis indicates the original metric or the normal-  
564 transformed of the trait value and the x-axis the years and replicates within a year. The  
565 color of the boxes indicates different years. Light sky blue, 2013; dark blue, 2014, teal  
566 blue, 2015.

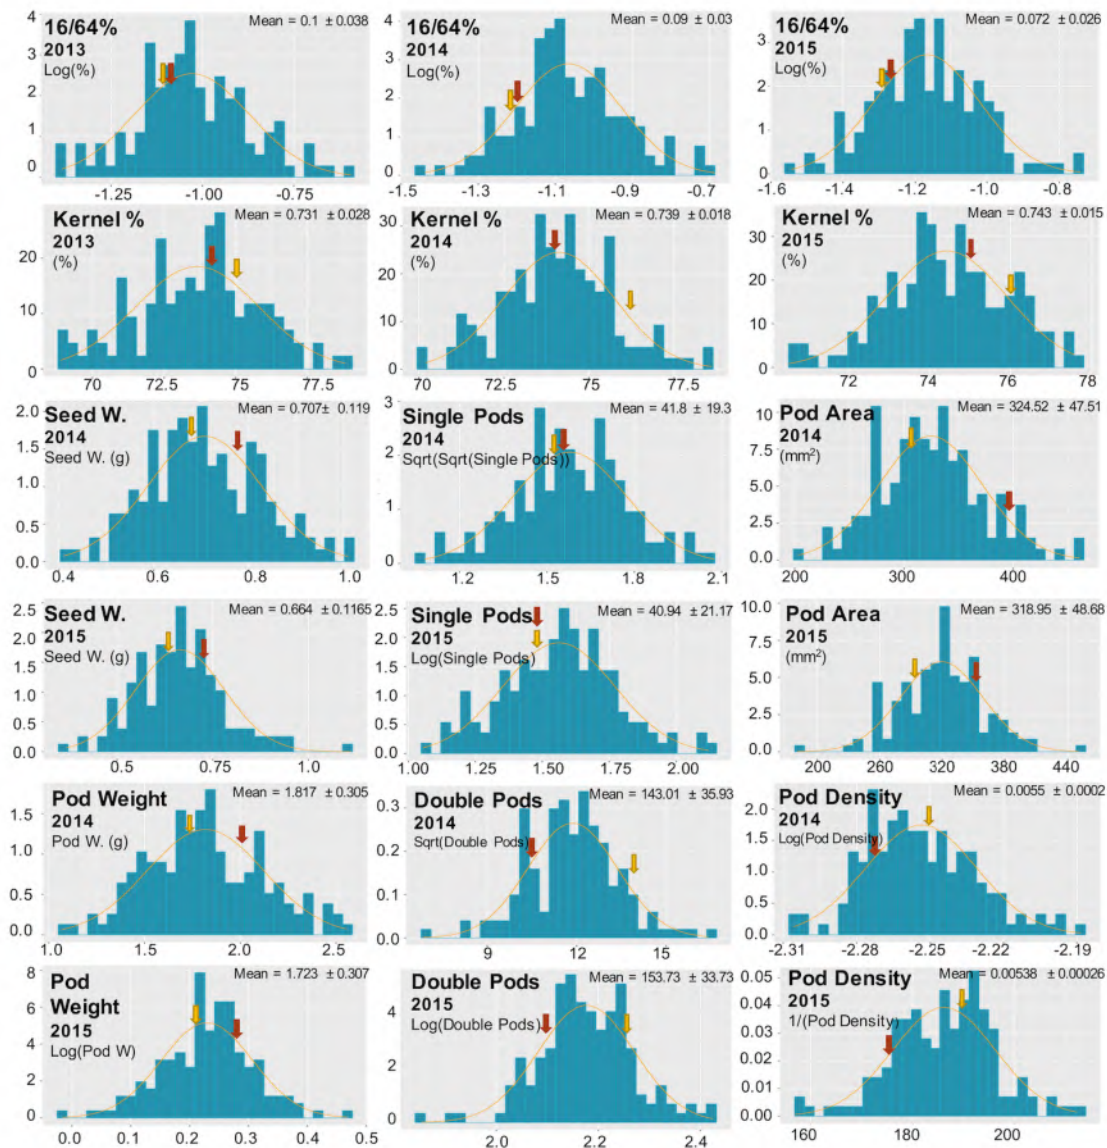

567

568 **Figure 3.** Phenotypic distribution for all traits in three consecutive years. Y-axis  
 569 corresponds to density, and X-axis corresponds to the original metric or the normal-  
 570 transformed trait value as indicated in the left corner of each plot, based on the average of  
 571 the three replicates per year. Log, logarithm; Sqrt, square root; 1/, reciprocal. Arrows  
 572 indicate the phenotypic values for NC 3033 (red) and Tifrunner (yellow). A normal  
 573 distribution curve is shown in orange. The mean and SD values are based on the raw data  
 574 according to Table 1.

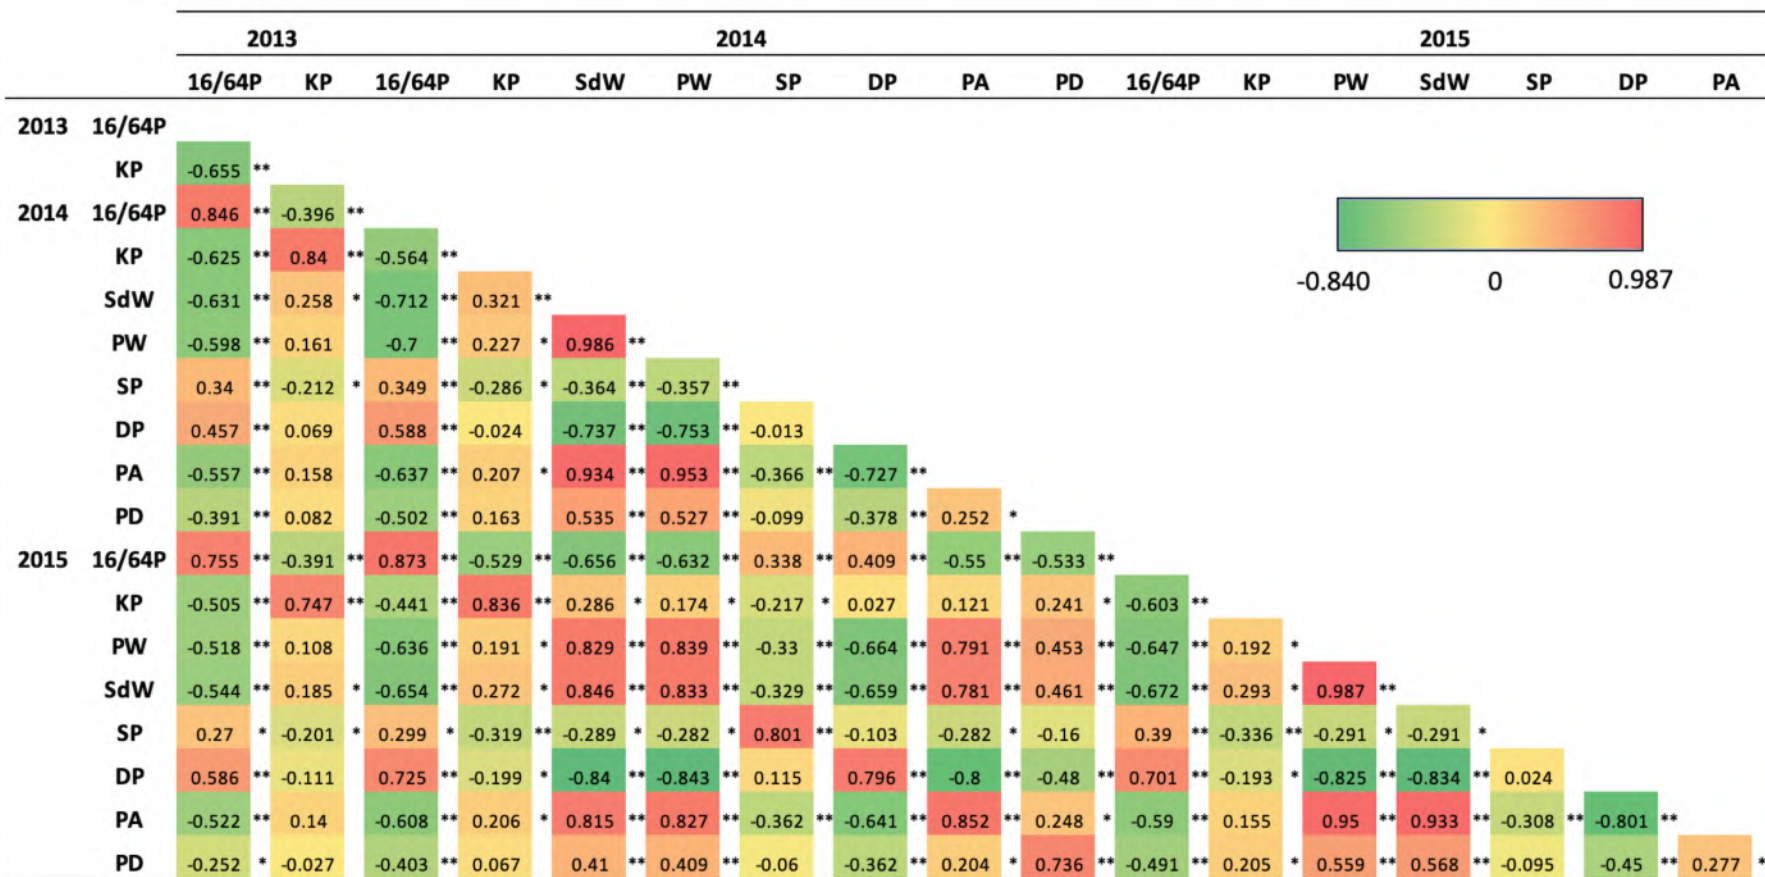

75

76

77

78

**Figure 4.** Pearson correlations for the seed and pod traits evaluated over three years. Red for the highest value and dark green for lowest value on the heatmap scale. Significant correlations \*  $P < 0.05$  and \*\*  $P < 0.001$ . 16/64P, 16/64 percentage as seed size index; KP, kernel percentage; PW, pod weight; SdW, seed weight; SP, single-kernel pods; DP, double-kernel pods; PA, pod area; PD, pod density.

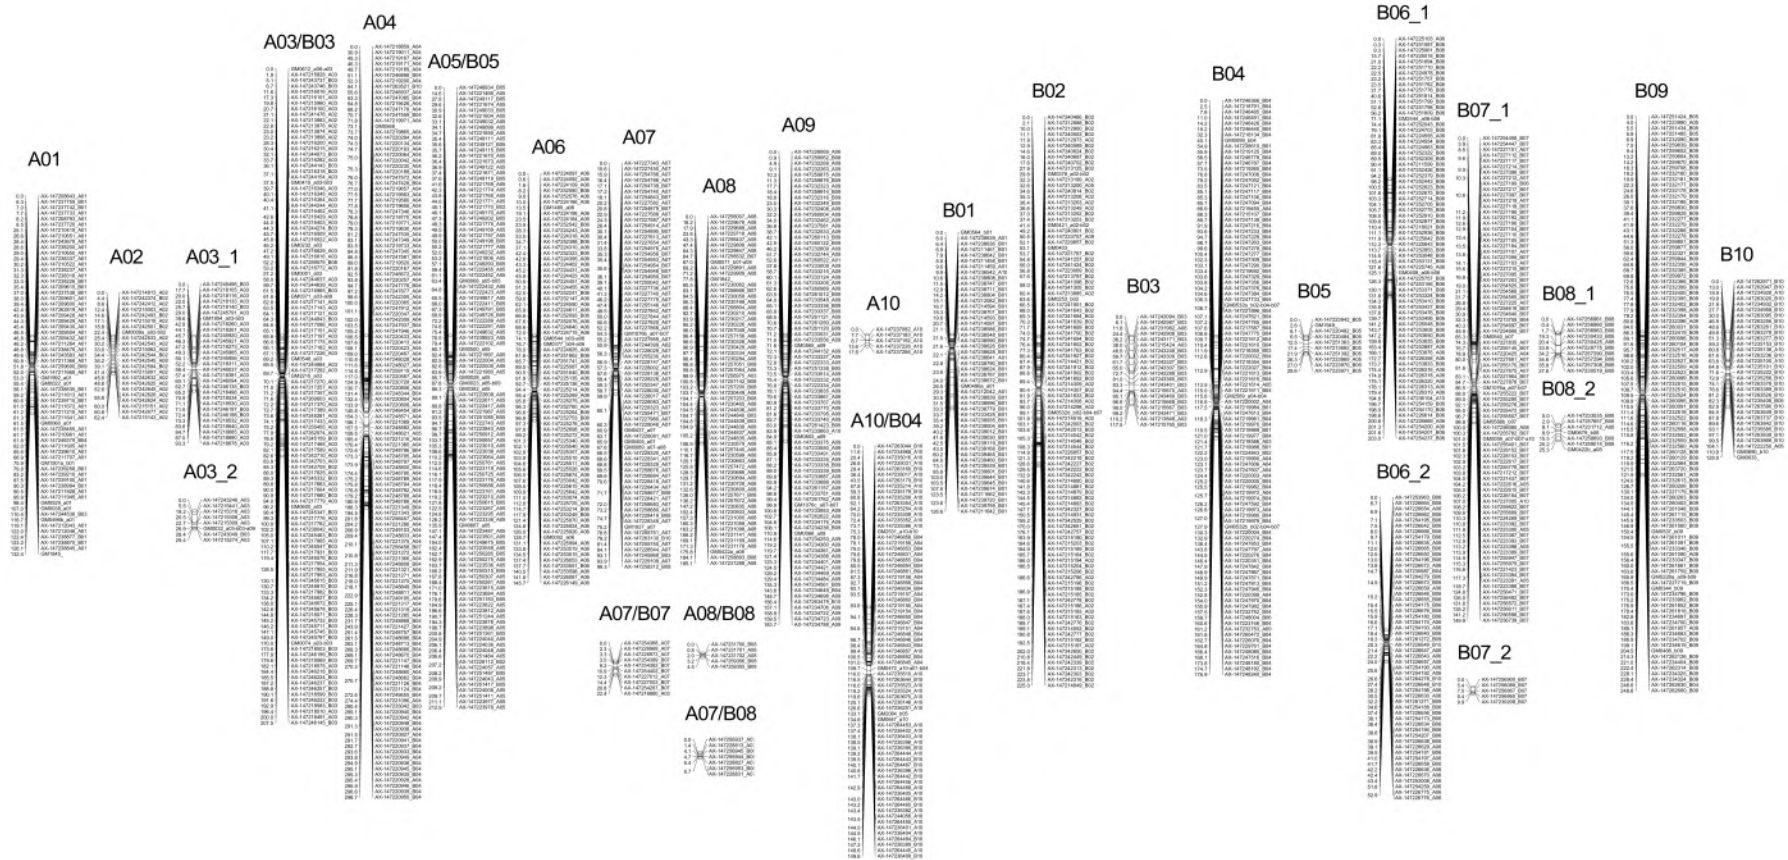

79

80 **Figure 5.** Genetic linkage map for the Tifrunner x NC 3033 RIL population. Distance in centimorgan (cM) is shown on left side of each  
 81 group. The names of the SNPs are followed by the original chromosome number assigned when they were described. The name of the  
 82 linkage groups was assigned based on the tetraploid reference genome.

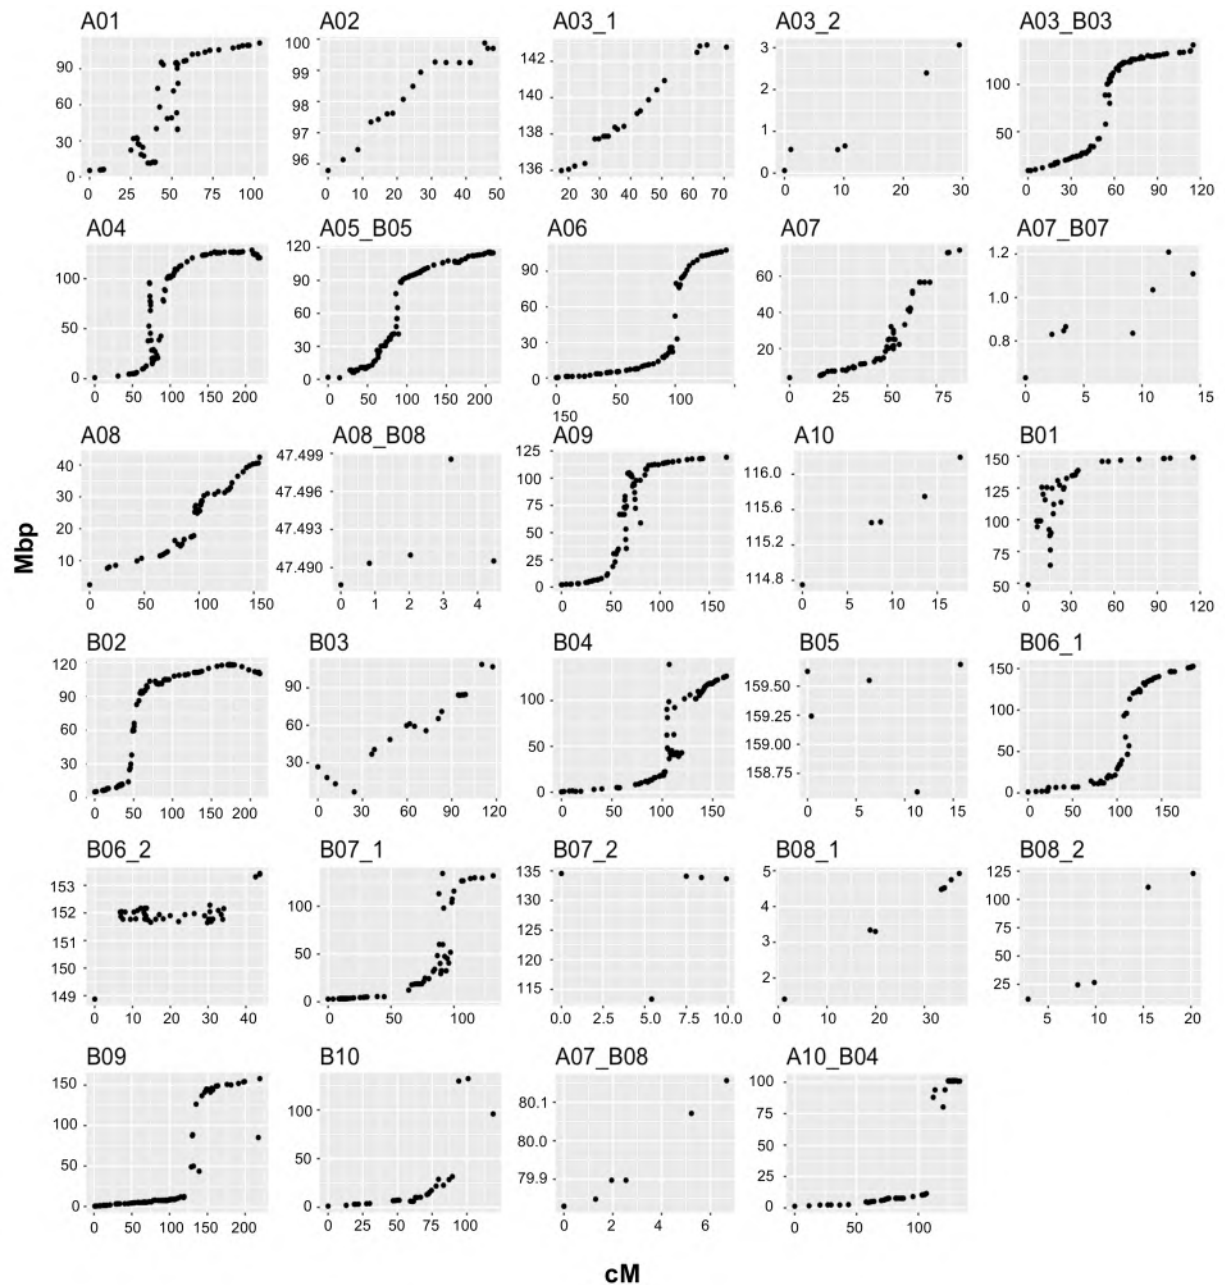

583

584 **Figure 6.** Genetic distance (cM) on x-axis vs physical distance in Mbp on y-axis for the  
585 Tifrunner x NC 3033 population based on the alignment of the SNP flanking sequences to  
586 the *A. hypogaea* reference genome cv. Tifrunner.

587

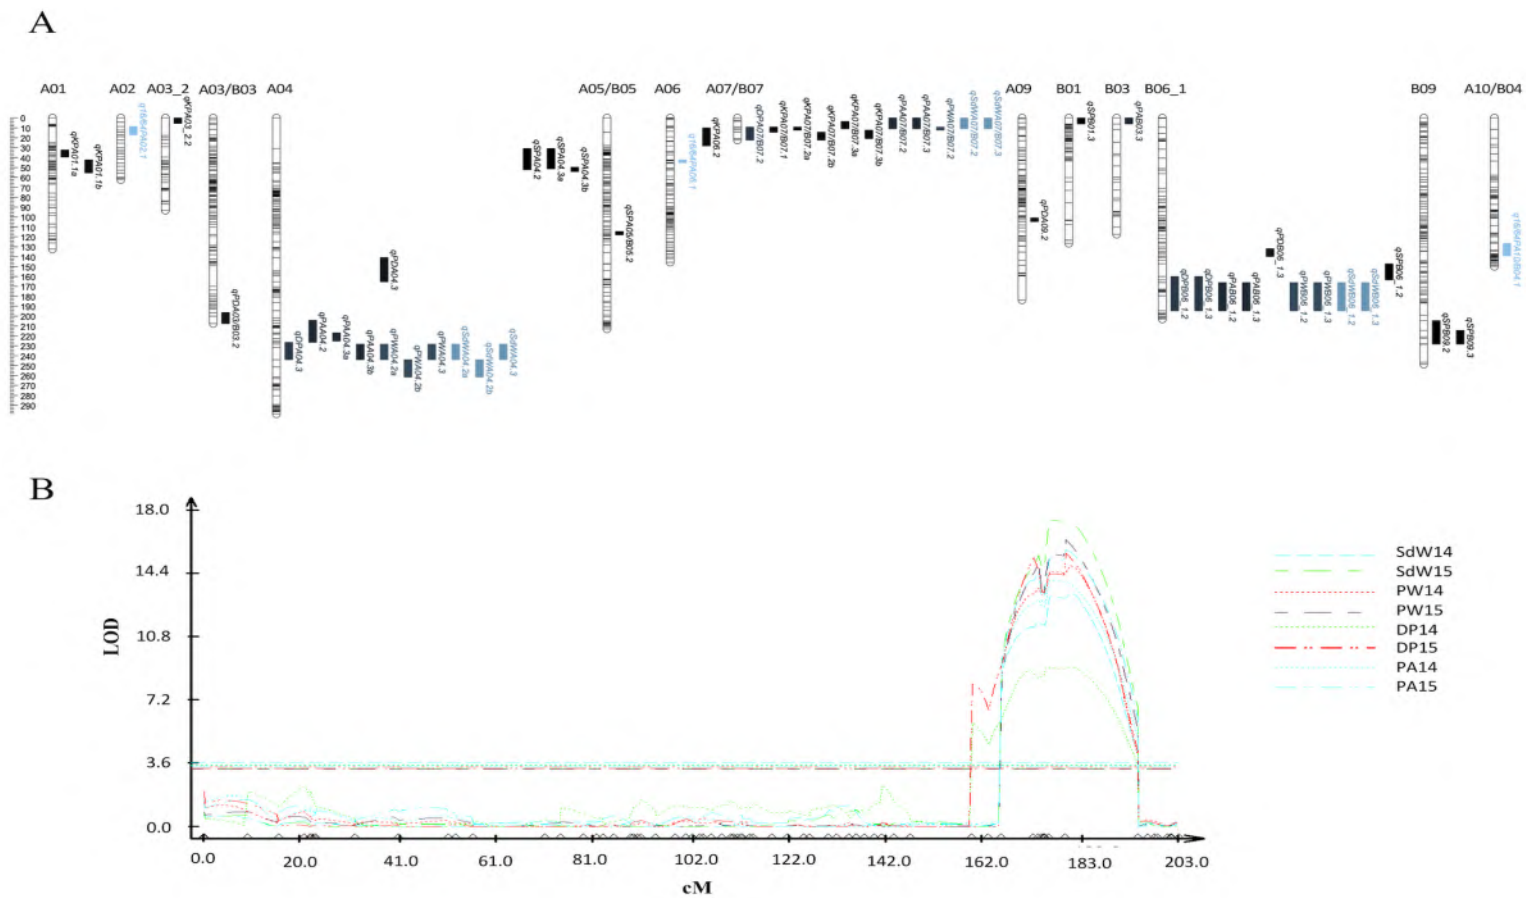

88

89 **Figure 7.** Overview of QTL identified for seed and pod traits on the Tifrunner x NC 3033 population. **A.** Linkage groups of the genetic  
 90 map with QTL positions indicated. The QTL identified for all the traits are differentiated by color. **B.** Linkage group B06\_1 indicating the  
 91 QTL co-localizing on the bottom arm of the group. The y-axis represents the LOD score and the x-axis represents the distance (cM) of the  
 92 linkage group and the markers mapped indicated by triangles on the bottom axis.

**Table 1.** Summary statistics for seed and pod traits in parents and the RILs based on raw data.

|      | Variable                | Parents   |         | RILs                  |          |          |
|------|-------------------------|-----------|---------|-----------------------|----------|----------|
|      |                         | Tifrunner | NC 3033 | Mean $\pm$ SD         | Minimum  | Maximum  |
| 2013 | 16/64P (%)              | 8.007     | 8.093   | 10 $\pm$ 3.8          | 4.133    | 25.43    |
|      | KP (%)                  | 75        | 74      | 73.1 $\pm$ 2.8        | 61.315   | 78.837   |
| 2014 | 16/64P (%)              | 6.87      | 6.94    | 9.0 $\pm$ 3.0         | 3.644    | 20.564   |
|      | KP (%)                  | 76        | 74      | 73.9 $\pm$ 1.8        | 66.223   | 78.599   |
|      | PW (g)                  | 1.68      | 2.05    | 1.817 $\pm$ 0.305     | 1.067    | 2.5516   |
|      | SdW (g)*                | 0.67      | 0.79    | 0.707 $\pm$ 0.119     | 0.4107   | 1.00975  |
|      | SP (count)              | 30.00     | 32.33   | 41.8 $\pm$ 19.3       | 12       | 118.67   |
|      | DP (count)              | 164.33    | 103.67  | 143.01 $\pm$ 35.93    | 46.67    | 269.67   |
|      | PA (mm <sup>2</sup> )   | 301.22    | 389.55  | 324.52 $\pm$ 47.51    | 204.02   | 460.59   |
|      | PD (g/mm <sup>2</sup> ) | 0.0056    | 0.0053  | 0.0055 $\pm$ 0.0002   | 0.004946 | 0.006477 |
| 2015 | 16/64P (%)              | 5.01      | 5.04    | 7.2 $\pm$ 2.6         | 2.863    | 18.139   |
|      | KP (%)                  | 76        | 75      | 0.743 $\pm$ 0.015     | 69..268  | 77.567   |
|      | PW (g)                  | 1.62      | 1.90    | 1.723 $\pm$ 0.307     | 0.9631   | 2.9426   |
|      | SdW (g)*                | 0.64      | 0.75    | 0.664 $\pm$ 0.1165    | 0.3681   | 1.11175  |
|      | SP                      | 23.33     | 23.33   | 40.94 $\pm$ 21.17     | 11.33    | 132      |
|      | DP                      | 178.67    | 126.67  | 153.73 $\pm$ 33.73    | 71.33    | 265.67   |
|      | PA (mm <sup>2</sup> )   | 285.81    | 360.12  | 318.95 $\pm$ 48.68    | 185.57   | 520.9    |
|      | PD (g/mm <sup>2</sup> ) | 0.00568   | 0.00527 | 0.00538 $\pm$ 0.00029 | 0.004714 | 0.006371 |

16/64P, 16/64 percentage as seed size index; KP, kernel percentage; PW, pod weight; SdW, seed weight; SP, single-kernel pods; DP, double-kernel pods; PA, pod area; PD, pod density.

\*SdW is reported as individual seed by dividing the original value from the weight of the two seeds contained in a pod.



**Table 2.** Analysis of variance and heritability for seed and pod traits for the RIL population across three years.

| Trait         | Variables  | df  | Mean Square | F-value | P-value | h <sup>2</sup> |
|---------------|------------|-----|-------------|---------|---------|----------------|
| <b>16/64P</b> | Year       | 2   | 1.773000    | 66.732  | <0.001  | 74.4%          |
|               | RIL        | 158 | 0.146410    | 22.969  | <0.001  |                |
|               | RIL x Year | 283 | 0.010780    | 1.692   | <0.001  |                |
|               | Error      | 771 | 0.006370    |         |         |                |
| <b>KP</b>     | Year       | 2   | 0.006400    | 13.101  | <0.001  | 68.7%          |
|               | RIL        | 158 | 0.002480    | 20.106  | <0.001  |                |
|               | RIL x Year | 283 | 0.000295    | 2.390   | <0.001  |                |
|               | Error      | 772 | 0.000123    |         |         |                |
| <b>PW</b>     | Year       | 1   | 0.133000    | 20.177  | <0.001  | 79.3%          |
|               | RIL        | 154 | 0.029922    | 19.764  | <0.001  |                |
|               | RIL x Year | 151 | 0.002186    | 1.444   | <0.005  |                |
|               | Error      | 575 | 0.001514    |         |         |                |
| <b>SdW</b>    | Year       | 1   | 0.172000    | 26.291  | <0.001  | 80.3%          |
|               | RIL        | 154 | 0.030020    | 21.008  | <0.001  |                |
|               | RIL x Year | 151 | 0.002080    | 1.456   | <0.05   |                |
|               | Error      | 575 | 0.001429    |         |         |                |
| <b>SP</b>     | Year       | 1   | 0.021000    | 0.212   | NS      | 61.3%          |
|               | RIL        | 154 | 0.330870    | 7.424   | <0.001  |                |
|               | RIL x Year | 150 | 0.047960    | 1.076   | NS      |                |
|               | Error      | 561 | 0.044570    |         |         |                |
| <b>DP</b>     | Year       | 1   | 0.000122    | 11.281  | <0.001  | 40.4%          |
|               | RIL        | 154 | 0.000025    | 3.429   | <0.001  |                |
|               | RIL x Year | 151 | 0.000010    | 1.347   | <0.01   |                |
|               | Error      | 576 | 0.000007    |         |         |                |
| <b>PA</b>     | Year       | 1   | 0.014504    | 3.058   | NS      | 79.6%          |
|               | RIL        | 154 | 0.021535    | 19.677  | <0.001  |                |
|               | RIL x Year | 151 | 0.001464    | 1.337   | <0.01   |                |
|               | Error      | 575 | 0.001094    |         |         |                |
| <b>PD</b>     | Year       | 1   | 0.000009    | 73.824  | <0.001  | 67.5%          |
|               | RIL        | 154 | 0.000000    | 11.275  | <0.001  |                |
|               | RIL x Year | 151 | 0.000000    | 1.751   | <0.001  |                |
|               | Error      | 571 | 0.000000    |         |         |                |

16/64P, 16/64 percentage as seed size index; KP, kernel percentage; PW, pod weight; SdW, seed weight; SP, single-kernel pods; DP, double-kernel pods; PA, pod area; PD, pod density.

h<sup>2</sup>, broad sense heritability.

NS indicates non-significance at P-value < 0.05.

**Table 3.** Genetic map description and comparison with physical distance based on the *A. hypogaea* reference genome.

| Chr     | LG           | No. SNPs | No. SSRs | Total No. Loci | Genetic Length (cM) | Average loci interval (cM) | No. Loci aligned to the respective pseudomolecule on the <i>A. hypogaea</i> reference genome | Physical Length (Mbp) | Average physical interval (Mbp) | Total length <i>A. hypogaea</i> genome (Mbp) | Coverage ratio | Recombination rate (cM/Mbp) |
|---------|--------------|----------|----------|----------------|---------------------|----------------------------|----------------------------------------------------------------------------------------------|-----------------------|---------------------------------|----------------------------------------------|----------------|-----------------------------|
| A01     | A01          | 56       | 8        | 64             | 132.4               | 2.1                        | 54                                                                                           | 106.21                | 2.00                            | 112.42                                       | 0.94           | 1.18                        |
| A02     | A02          | 22       | 1        | 23             | 62.4                | 2.8                        | 18                                                                                           | 4.09                  | 0.24                            | 102.98                                       | 0.04           | 0.61                        |
| A03     | A03_1        | 28       | 1        | 29             | 93.3                | 3.3                        | 21                                                                                           | 6.91                  | 0.35                            | 143.81                                       | 0.05           | 0.65                        |
|         | A03_2        | 7        | 1        | 8              | 29.4                | 4.2                        | 6                                                                                            | 3.00                  | 0.60                            | 143.81                                       | 0.02           | 0.20                        |
|         | A03_B03      | 107      | 9        | 116            | 207.5               | 1.8                        | 83                                                                                           | 132.91                | 1.62                            | 143.81                                       | 0.92           | 1.44                        |
| A04     | A04          | 132      | 1        | 133            | 298.7               | 2.3                        | 96                                                                                           | 127.52                | 1.34                            | 128.80                                       | 0.99           | 2.32                        |
| A05     | A05_B05      | 104      | 6        | 110            | 212.9               | 2.0                        | 105                                                                                          | 114.38                | 1.10                            | 115.93                                       | 0.99           | 1.84                        |
| A06     | A06          | 69       | 4        | 73             | 145.7               | 2.0                        | 71                                                                                           | 107.46                | 1.54                            | 115.50                                       | 0.93           | 1.26                        |
| A07     | A07          | 67       | 5        | 72             | 99.3                | 1.4                        | 54                                                                                           | 70.42                 | 1.33                            | 81.12                                        | 0.87           | 1.22                        |
|         | A07_B07      | 10       | 0        | 10             | 22.4                | 2.5                        | 8                                                                                            | 0.58                  | 0.08                            | 81.12                                        | 0.007          | 0.28                        |
| A08     | A08          | 59       | 3        | 62             | 185.1               | 3.0                        | 56                                                                                           | 40.02                 | 0.73                            | 51.90                                        | 0.77           | 3.57                        |
|         | A08_B08      | 5        | 0        | 5              | 4.5                 | 1.1                        | 5                                                                                            | 0.01                  | 0.00                            | 51.90                                        | 0.0002         | 0.09                        |
| A09     | A09          | 80       | 4        | 84             | 183.7               | 2.2                        | 72                                                                                           | 117.03                | 1.65                            | 120.52                                       | 0.97           | 1.52                        |
| A10     | A10          | 5        | 0        | 5              | 17.6                | 4.4                        | 5                                                                                            | 1.44                  | 0.36                            | 117.09                                       | 0.01           | 0.15                        |
| B01     | B01          | 48       | 2        | 50             | 126.6               | 2.6                        | 40                                                                                           | 100.39                | 2.57                            | 149.30                                       | 0.67           | 0.85                        |
| B02     | B02          | 96       | 5        | 101            | 225.0               | 2.3                        | 95                                                                                           | 113.00                | 1.20                            | 120.58                                       | 0.94           | 1.87                        |
| B03     | B03          | 20       | 0        | 20             | 117.5               | 6.2                        | 20                                                                                           | 10.22                 | 0.54                            | 146.73                                       | 0.07           | 0.80                        |
| B04     | B04          | 98       | 4        | 102            | 176.9               | 1.8                        | 87                                                                                           | 139.23                | 1.62                            | 143.24                                       | 0.97           | 1.23                        |
| B05     | B05          | 9        | 1        | 10             | 28.6                | 3.2                        | 5                                                                                            | 1.10                  | 0.27                            | 160.88                                       | 0.01           | 0.18                        |
| B06     | B06_1        | 69       | 2        | 71             | 203.0               | 2.9                        | 63                                                                                           | 151.63                | 2.45                            | 154.81                                       | 0.98           | 1.31                        |
|         | B06_2        | 54       | 0        | 54             | 52.9                | 1.0                        | 43                                                                                           | 4.56                  | 0.11                            | 154.81                                       | 0.03           | 0.34                        |
| B07     | B07_1        | 82       | 4        | 86             | 149.9               | 1.8                        | 71                                                                                           | 131.45                | 1.88                            | 134.92                                       | 0.97           | 1.11                        |
|         | B07_2        | 5        | 0        | 5              | 9.9                 | 2.5                        | 5                                                                                            | 21.19                 | 5.30                            | 134.92                                       | 0.16           | 0.07                        |
| B08     | B08_1        | 10       | 0        | 10             | 37.6                | 4.2                        | 8                                                                                            | 3.51                  | 0.50                            | 135.15                                       | 0.03           | 0.28                        |
|         | B08_2        | 5        | 2        | 7              | 25.3                | 4.2                        | 5                                                                                            | 111.04                | 27.76                           | 135.15                                       | 0.82           | 0.19                        |
| B09     | B09          | 98       | 4        | 102            | 248.6               | 2.5                        | 82                                                                                           | 157.62                | 1.95                            | 158.63                                       | 0.99           | 1.57                        |
| B10     | B10          | 30       | 2        | 32             | 128.9               | 4.2                        | 29                                                                                           | 130.93                | 4.68                            | 143.98                                       | 0.91           | 0.90                        |
| A07_B08 | A07_B08      | 7        | 0        | 7              | 6.7                 | 1.1                        | 7                                                                                            | 0.33                  | 0.05                            | -                                            | -              | -                           |
| A10_B04 | A10_B04      | 69       | 4        | 73             | 149.8               | 2.1                        | 55                                                                                           | 99.94                 | 1.85                            | -                                            | -              | -                           |
|         | <i>Mean</i>  | 50       | 2.5      | 53             | 116.6               | 2.7                        | 44                                                                                           | 69.25                 | 2.26                            | 125.33                                       | 0.56           | 0.93                        |
|         | <i>Total</i> | 1451     | 73       | 1524           | 3382.0              | 77.4                       | 1269                                                                                         | 2008.13               | 65.67                           | 3383.81                                      | 15.06          | 27.02                       |



**Table 5.** Co-localizing QTL including a range of genetic and physical positions and number of genes comprised on the respective regions.

| LG      | QTLs                                                                                                    | Closest Markers                                      | Genetic Position (cM) range | Physical Position (Mbp) range | Number of genes in the interval | LOD range      | Additive Effect Range | Phenotypic variance range (R <sup>2</sup> %) |
|---------|---------------------------------------------------------------------------------------------------------|------------------------------------------------------|-----------------------------|-------------------------------|---------------------------------|----------------|-----------------------|----------------------------------------------|
| A04     | <i>qSPA04.2, qSPA04.3a</i>                                                                              | AX-147219189_A04, AX-147219167_A04                   | 30.873 - 52.283             | 2.66 - 5.05                   | 220                             | 3.704 - 5.245  | -0.0646 to - 0.0576   | 7.2% - 10.1%                                 |
| A04     | <i>qPAA04.2, qPAA04.3a</i>                                                                              | AX-147249103_A04, AX-147248868_B04                   | 204.167 - 226.372           | 126.21 - 126.76               | 53                              | 4.230 - 4.478  | 0.0178 to 12.7298     | 6.5% - 7.2%                                  |
| A04     | <i>qPWA04.2a, qPWA04.2b, qPWA04.3, qSdWA04.2a, qSdWA04.2b, qSdWA04.3, qDPA04.3, qPAA04.3b</i>           | AX-147221427_B04, AX-147249105_A04, AX-147248868_B04 | 226.372- 261.457            | 125.10 - 126.38               | 107                             | 3.748 - 6.206  | -0.032 to 0.0949      | 5.3% - 11.0%                                 |
| A07_B07 | <i>qPAA07_B07.2, qPAA07_B07.3, qSdWA07_B07.2, qSdWA07_B07.3, qKPA07_B07.1, qKPA07_B07.2a,</i>           | AX-147226969_A07, AX-147254368_A07                   | 0 - 10.931                  | 0.63 - 1.03                   | 56                              | 6.824 - 8.889  | -18.1879 to - 0.0214  | 10.5% - 14.5%                                |
| A07_B07 | <i>qKPA07_B07.3a, qDPA07_B07.2, qPWA07_B07.2</i>                                                        | AX-147254382_B07, AX-147254287_B07, AX-147254402_B07 | 3.453 - 22.359              | 0.84 - >1.20                  | >46                             | 3.75 - 14.589  | -0.112 to 0.8929      | 29.2% - 8.4%                                 |
| A07_B07 | <i>qKPA07_B07.2b, qKPA07_B07.3b</i>                                                                     | AX-147227012_A07, AX-147254287_B07                   | 12.291 - 22.359             | 1.10 - >1.20                  | >9                              | 4.243 - 5.157  | 0.0051 to 0.0056      | 9.3% - 10.8%                                 |
| B06_1   | <i>qDPB06_1.2, qDPB06_1.3, qPAB06_1.2, qPAB06_1.3, qPWB06_1.2, qPWB06_1.3, qSdWB06_1.2, qSdWB06_1.3</i> | AX-147226319_A06, AX-147226313_A06                   | 159.887 - 179.389           | 146.38 - 150.86               | <290                            | 9.076 - 17.476 | -23.8448 to 0.6392    | 17.0% - 31.4%                                |
| B09     | <i>qSPB09.2, qSPB09.3</i>                                                                               | AX-147262126_B09, AX-147262314_B09                   | 204.463 - 228.094           | 150.29 - 158.02               | 620                             | 5.137 - 5.18   | -0.0688 - - 0.0677    | 10.2% - 10.6%                                |

**Table 6.** QTL found close or overlapping with QTL identified for seed and pod traits in previous studies. The comparison was made based on the physical location of the tetraploid species by sequence alignment using BLAST to the reference genome.

| Reference QTL                                                                                           | Physical distance of flanking region (Mbp) | Chr | QTL from previous research                                                                                                                                 | Traits from previous research             | Peak marker or start marker    | Physical position (Mbp) previous research | Blastn % Identity | Blastn Alignment length (bp) | Blastn e-value | Reference           |
|---------------------------------------------------------------------------------------------------------|--------------------------------------------|-----|------------------------------------------------------------------------------------------------------------------------------------------------------------|-------------------------------------------|--------------------------------|-------------------------------------------|-------------------|------------------------------|----------------|---------------------|
| <i>q16/64PA02.1</i>                                                                                     | 96.45 - 97.60                              | A02 | PL_WL                                                                                                                                                      | Pod Length                                | TC9B07                         | 101.35                                    | 98.0              | 346                          | 2.9E-169       | Fonceka et al. 2012 |
| <i>q16/64PA10_B04.1</i>                                                                                 | 80.28 - 101.14                             | A10 | qPWA10.2                                                                                                                                                   | Pod Width                                 | GM2084                         | 80.28                                     | 99.5              | 720                          | 0              | Chen et al. 2016    |
| <i>qPAA07/B07.2, qPAA07/B07.3, qSdWA07/B07.2, qSdWA07/B07.3</i>                                         | 0.63 - 1.03                                | A07 | qHPWA07.1(E4), qHPWA07.1(E3), qHPWA07.1(E2), qHPWA07.1(E1), qPWA07(E4), qPWA07(E3), qPWA07(E2), qPWA07(E1), qPLA07(E4), qPLA07(E3), qPLA07(E2), qPLA07(E1) | 100-pod weight<br>Pod width<br>Pod length | AHGS1836                       | 0.76                                      | 99.5              | 840                          | 0              | Luo et al. 2018     |
| <i>qKPA07/B07.1, qKPA07/B07.2a, qKPA07/B07.3a, qDPA07/B07.2, qPWA07/B07.2</i>                           | 0.84 - >1.20                               | A07 | qHPWA07.1(E4), qHPWA07.1(E3), qHPWA07.1(E2), qHPWA07.1(E1), qPWA07(E4), qPWA07(E3), qPWA07(E2), qPWA07(E1), qPLA07(E4), qPLA07(E3), qPLA07(E2), qPLA07(E1) | 100-pod weight<br>Pod width<br>Pod length | AHGS1836                       | 0.76                                      | 99.5              | 840                          | 0              | Luo et al. 2018     |
| <i>qSPA05/B05.2</i>                                                                                     | 96.58 - 97.34                              | A05 | uqA5-7                                                                                                                                                     | Number seed/pod                           | AGGS451                        | 91.34                                     | 99.0              | 19,237                       | 0              | Chen et al. 2019    |
| <i>qKPA03_2.2</i>                                                                                       | 0.06 - 0.56                                | A03 | qHSPA03, qSLA03                                                                                                                                            | 100-seed weight<br>Seed length            | AhSNP1417767                   | 3.79                                      | 98.6              | 26,258                       | 0              | Wang et al. 2018    |
| <i>qSPA04.3b</i>                                                                                        | 4.93 - 5.37                                | A04 | qSLA04.1                                                                                                                                                   | Seed length                               | AhSNP13558548                  | 8.94                                      | 99.7              | 35,567                       | 0              | Wang et al. 2018    |
| <i>qSPA04.2, qSPA04.3a</i>                                                                              | 2.66 - 505                                 | A04 | qSLA04.1                                                                                                                                                   | Seed length                               | AhSNP13558548                  | 8.94                                      | 99.7              | 35,567                       | 0              | Wang et al. 2018    |
| <i>qPDB06_1.3</i>                                                                                       | 130.49 - 136.39                            | B06 | qHPWB06, qHSWB06.2                                                                                                                                         | 100-pod weight<br>100-seed weight         | AhSNP14871490<br>AhSNP15007648 | 134.59                                    | 99.9              | 36,427                       | 0              | Wang et al. 2018    |
| <i>qPDB06_1.3</i>                                                                                       | 130.49 - 136.39                            | B06 | qPWB06.3, qPLB06.2                                                                                                                                         | Pod width<br>Pod length                   | AhSNP14591706<br>AhSNP15460609 | 135.70                                    | 99.9              | 32,807                       | 0              | Wang et al. 2018    |
| <i>qPDB06_1.3</i>                                                                                       | 130.49 - 136.39                            | B06 | qSLB06.3                                                                                                                                                   | Seed length                               | AhSNP14732062                  | 137.78                                    | 99.9              | 29,716                       | 0              | Wang et al. 2018    |
| <i>qSPB06_1.2</i>                                                                                       | 140.36 - 146.39                            | B06 | qSLB06.3                                                                                                                                                   | Seed length                               | AhSNP14732062                  | 137.78                                    | 99.9              | 29,716                       | 0              | Wang et al. 2018    |
| <i>qSPB06_1.2</i>                                                                                       | 140.36 - 146.39                            | B06 | qLWRSB06                                                                                                                                                   | Length-width ratio of seed                | AhSNP14760776                  | 142.05                                    | 99.8              | 24,832                       | 0              | Wang et al. 2018    |
| <i>qDPB06_1.2, qDPB06_1.3, qPAB06_1.2, qPAB06_1.3, qPWB06_1.2, qPWB06_1.3, qSdWB06_1.2, qSdWB06_1.3</i> | 146.38 - 150.86                            | B06 | qLWRSB06                                                                                                                                                   | Length-width ratio of seed                | AhSNP14760776                  | 142.05                                    | 99.8              | 24,832                       | 0              | Wang et al. 2018    |
| <i>qSPB09.2, qSPB09.3</i>                                                                               | 150.29 - 158.02                            | B09 | qFBNB09                                                                                                                                                    | Fruiting branch number                    | AhSNP2644292                   | 153.81                                    | 99.9              | 28,884                       | 0              | Wang et al. 2018    |

1

2

## References

3

Agarwal, G., J. Clevenger, M. K. M. Pandey, H. Wang, Y. Shasidhar *et al.*, 2018 High-

4

density genetic map using whole-genome re-sequencing for fine mapping and candidate

5

gene discovery for disease resistance in peanut. *Plant Biotechnol. J.* 16: 1954–1967.

6

Bennetzen, J. L., J. Ma, and K. M. Devos, 2005 Mechanisms of recent genome size variation

7

in flowering plants. *Ann. Bot.* 95: 127–132.

8

Bertioli, D. J., S. B. Cannon, L. Froenicke, G. Huang, A. D. Farmer *et al.*, 2016 The genome

9

sequences of *Arachis duranensis* and *Arachis ipaensis*, the diploid ancestors of

10

cultivated peanut. *Nat. Genet.* 48: 438–446.

11

Bertioli, D. J., J. Jenkins, J. Clevenger, O. Dudchenko, D. Gao *et al.*, 2019 The genome

12

sequence of segmental allotetraploid peanut *Arachis hypogaea*. *Nat. Genet.* 51: 877–

13

884.

14

Bertioli, D. J., P. Ozias-Akins, Y. Chu, K. M. Dantas, S. P. Santos *et al.*, 2014 The use of

15

SNP markers for linkage mapping in diploid and tetraploid peanuts. *G3 Genes,*

16

*Genomes, Genet.* 4: 89–96.

17

Beute, M. K., J. C. Wynee, and D. A. Emery, 1976 Registration of NC 3033 peanut

18

germplasm. *Crop Sci.* 16: 887.

19

Boote, K. J., 1982 Growth stages of peanut (*Arachis hypogaea* L.). *Peanut Sci.* 9: 35–40.

20

Chen, W., Y. Jiao, L. Cheng, L. Huang, B. Liao *et al.*, 2016a Quantitative trait locus analysis

21

for pod-and kernel-related traits in the cultivated peanut (*Arachis hypogaea* L.). *BMC*

22

*Genet.* 17: 25.

- 23 Chen, X., H. H. Li, M. K. Pandey, Q. Yang, X. Wang *et al.*, 2016b Draft genome of the  
24 peanut A-genome progenitor (*Arachis duranensis*) provides insights into geocarpy, oil  
25 biosynthesis, and allergens. *Proc. Natl. Acad. Sci. U. S. A.* 113: 6785–90.
- 26 Chen, Y., X. Ren, Y. Zheng, X. Zhou, L. Huang *et al.*, 2017 Genetic mapping of yield traits  
27 using RIL population derived from Fuchuan Dahuasheng and ICG6375 of peanut  
28 (*Arachis hypogaea* L.). *Mol. Breed.* 37: 17.
- 29 Chen, Y., Z. Wang, X. Ren, L. Huang, J. Guo *et al.*, 2019 Identification of major QTL for  
30 seed number per pod on chromosome A05 of tetraploid peanut (*Arachis hypogaea* L.).  
31 *Crop J.* 7: 238–248.
- 32 Chu, Y., J. Clevenger, R. Hovav, J. Wang, B. Scheffler *et al.*, 2016 Application of genomic,  
33 transcriptomic, and metabolomic technologies in *Arachis* Species, pp. 209–240 in  
34 *Peanuts: Genetics, Processing and Utilization*, edited by T. Stalker and R. F. Wilson.  
35 Elsevier Inc., Ann Arbor, MI.
- 36 Clarke, J. M., 1979 Intra-Plant variation in number of seeds per pod and seed weight in  
37 *Brassica napus* “Tower.” *Can. J. Plant Sci.* 59: 959–962.
- 38 Clements, J. C., M. Dracup, and N. Galwey, 2002 Effect of genotype and environment on  
39 proportion of seed hull and pod wall in lupin. *Aust. J. Agric. Res.* 53: 1147.
- 40 Clevenger, J., C. Chavarro, S. A. A. Pearl, P. Ozias-Akins, and S. A. A. Jackson, 2015  
41 Single Nucleotide Polymorphism identification in polyploids: A review, example, and  
42 recommendations. *Mol. Plant* 8: 831–846.
- 43 Clevenger, J., Y. Chu, C. Chavarro, G. Agarwal, D. J. Bertioli *et al.*, 2017 Genome-wide  
44 SNP genotyping resolves signatures of selection and tetrasomic recombination in

- 45 peanut. *Mol. Plant* 10: 309–322.
- 46 Clevenger, J. P., W. Korani, P. Ozias-Akins, and S. Jackson, 2018 Haplotype-based  
47 genotyping in polyploids. *Front. Plant Sci.* 9: 564.
- 48 Clevenger, J. P., and P. Ozias-Akins, 2015 SWEEP: A tool for filtering high quality SNPs in  
49 polyploid crops. *G3 Genes, Genomes, Genet.* 5: 1797–1803.
- 50 El-Zeadani, H., A. B. Puteh, M. M. A. Mondal, A. Selamat, Z. A. Ahmad *et al.*, 2014 Seed  
51 growth rate, seed filling period and yield responses of soybean (*Glycine max*) to plant  
52 densities at specific reproductive growth stages. *Int. J. Agric. Biol* 16: 1560–8530.
- 53 FAO, 2017 Seeds | FAO | Food and Agriculture Organization of the United Nations.  
54 Available at: <http://www.fao.org/seeds/en/>.
- 55 Fávero, A. P., C. E. Simpson, J. F. M. Valls, and N. A. Vello, 2006 Study of the evolution of  
56 cultivated peanut through crossability studies among *Arachis ipaensis*, *A. duranensis*,  
57 and *A. hypogaea*. *Crop Sci.* 46: 1546–1552.
- 58 Faye, I., M. K. Pandey, F. Hamidou, A. Rathore, O. Ndoye *et al.*, 2015 Identification of  
59 quantitative trait loci for yield and yield related traits in groundnut (*Arachis hypogaea*  
60 L.) under different water regimes in Niger and Senegal. *Euphytica*.
- 61 Fonceka, D., H.-A. Tossim, R. Rivallan, H. Vignes, I. Faye *et al.*, 2012 Fostered and left  
62 behind alleles in peanut: interspecific QTL mapping reveals footprints of domestication  
63 and useful natural variation for breeding. *BMC Plant Biol.* 12: 26.
- 64 Gambín, B. L., and L. Borrás, 2009 Resource distribution and the trade-off between seed  
65 number and seed weight: a comparison across crop species. *Ann. Appl. Biol.* 156: 91–  
66 102.



- 67 Gilman, D. F., and O. D. Smith, 1977 Internal pericarp color as a subjective maturity index  
68 for peanut breeding. *Peanut Sci.* 4: 67–70.
- 69 Gnan, S., A. Priest, and P. X. Kover, 2014 The genetic basis of natural variation in seed size  
70 and seed number and their trade-off using *Arabidopsis thaliana* MAGIC lines. *Genetics*  
71 198: 1751–8.
- 72 de Godoy, I. J., and A. J. Norden, 1981 Shell and seed size relationships in peanuts. *Peanut*  
73 *Sci.* 8: 21–24.
- 74 Gomez Selvaraj, M., M. Narayana, A. M. Schubert, J. L. Ayers, M. R. Baring *et al.*, 2009  
75 Identification of QTLs for pod and kernel traits in cultivated peanut by bulked  
76 segregant analysis. *Electron. J. Biotechnol.* 12: 1–10.
- 77 Guo, Y., S. Khanal, S. Tang, J. E. Bowers, A. F. Heesacker *et al.*, 2012 Comparative  
78 mapping in intraspecific populations uncovers a high degree of macrosynteny between  
79 A- and B-genome diploid species of peanut. *BMC Genomics* 13: 608.
- 80 Guo, B., P. Khera, H. Wang, Z. Peng, H. Sudini *et al.*, 2016 Annotation of trait loci on  
81 integrated genetic maps of *Arachis* species, pp. 163–207 in *Peanuts: Genetics,*  
82 *Processing, and Utilization*, edited by H. T. Stalker and R. Wilson. Academic Press and  
83 AOCS Press, Ann Arbor, MI.
- 84 Habekotté, B., 1993 Quantitative analysis of pod formation, seed set and seed filling in  
85 winter oilseed rape (*Brassica napus* L.) under field conditions. *F. Crop. Res.* 35: 21–33.
- 86 Hadley, B. A., M. K. Beute, and J. C. Wynne, 1979 Heritability of *Cylindrocladium* Black  
87 Rot resistance in peanut. *Peanut Sci.* 6: 51–54.
- 88 Hammons, R. O., 1973 Genetics of *Arachis Hypogaea*, pp. 135–173 in *Peanuts: Culture and*

- 89        *Uses*, Amer. Peanut Res. Educ. Soc., Stillwater, OK.
- 90    Hammons, R. O., D. K. Bell, and E. K. Sobers, 1981 Evaluating peanuts for resistance to  
91        *Cylindrocladium* Black Rot. *Peanut Sci.* 8: 117–120.
- 92    Holbrook, C. C., and A. K. Culbreath, 2007 Registration of ‘Tifrunner’ Peanut. *J. Plant*  
93        *Regist.* 1: 124.
- 94    Holbrook, C. C., T. G. Isleib, P. Ozias-Akins, Y. Chu, S. J. Knapp *et al.*, 2013 Development  
95        and phenotyping of Recombinant Inbred Line (RIL) populations for peanut (*Arachis*  
96        *hypogaea*). *Peanut Sci.* 40: 89–94.
- 97    Holbrook, C., P. Ozias-Akins, Y. Chu, and B. Guo, 2011 Impact of molecular genetic  
98        research on peanut cultivar development. *Agronomy* 1: 3–17.
- 99    Hong, Y., X. Chen, X. Liang, H. Liu, G. Zhou *et al.*, 2010 A SSR-based composite genetic  
100       linkage map for the cultivated peanut (*Arachis hypogaea* L.) genome. *BMC Plant Biol.*  
101       10: 17.
- 102    Huang, L., H. He, W. Chen, X. Ren, Y. Chen *et al.*, 2015 Quantitative trait locus analysis of  
103       agronomic and quality-related traits in cultivated peanut (*Arachis hypogaea* L.). *Theor.*  
104       *Appl. Genet.* 128: 1103–15.
- 105    Huang, L., X. Ren, B. Wu, X. Li, W. Chen *et al.*, 2016 Development and deployment of a  
106       high-density linkage map identified quantitative trait loci for plant height in peanut  
107       (*Arachis hypogaea* L.). *Sci. Rep.* 6: 39478.
- 108    Imsande, J., and J. M. Schmidt, 1998 Effect of N source during soybean pod filling on  
109       nitrogen and sulfur assimilation and remobilization. *Plant Soil* 202: 41–47.
- 110    Jensen-Seaman, M. I., T. S. Furey, B. A. Payseur, Y. Lu, K. M. Roskin *et al.*, 2004

- 111 Comparative recombination rates in the rat, mouse, and human genomes. *Genome Res.*  
112 14: 528–38.
- 113 Kantolic, A. G., and G. A. Slafer, 2007 Development and seed number in indeterminate  
114 soybean as affected by timing and duration of exposure to long photoperiods after  
115 flowering. *Ann. Bot.* 99: 925–33.
- 116 Kochert, G., T. Halward, W. D. Branch, and C. E. Simpson, 1991 RFLP variability in peanut  
117 (*Arachis hypogaea* L.) cultivars and wild species. *Theor. Appl. Genet.* 81: 565–570.
- 118 Kochert, G., H. T. Stalker, M. Gimenes, L. Galgaro, C. R. Lopes *et al.*, 1996 RFLP and  
119 cytogenetic evidence on the origin and evolution of allotetraploid domesticated peanut,  
120 *Arachis hypogaea* (Leguminosae). *Am. J. Bot.* 83: 1282–1291.
- 121 Kocmarek, A. L., M. M. Ferguson, and R. G. Danzmann, 2015 Co-localization of growth  
122 QTL with differentially expressed candidate genes in rainbow trout. *Genome* 58: 393–  
123 403.
- 124 Koilkonda, P., S. Sato, S. Tabata, K. Shirasawa, H. Hirakawa *et al.*, 2012 Large-scale  
125 development of expressed sequence tag-derived simple sequence repeat markers and  
126 diversity analysis in *Arachis* spp. *Mol. Breed.* 30: 125–138.
- 127 Korani, W., Y. Chu, C. C. Holbrook, and P. Ozias-Akins, 2018 Insight into genes regulating  
128 postharvest aflatoxin contamination of tetraploid peanut from transcriptional profiling.  
129 *Genetics* 209: 143–156.
- 130 Leal-Bertioli, S. C. M., M. C. Moretzsohn, P. A. Roberts, C. Ballén-Taborda, T. C. O. Borba  
131 *et al.*, 2015 Genetic mapping of resistance to meloidogyne arenaria in *Arachis*  
132 *stenosperma*: A new source of nematode resistance for peanut. *G3 Genes, Genomes,*

- 133 Genet. 6: 377–90.
- 134 Liang, Y., M. Baring, S. Wang, and E. M. Septiningsih, 2017 Mapping QTLs for leafspot  
135 resistance in peanut using SNP-based Next-Generation Sequencing markers. Plant  
136 Breed. Biotechnol. 5: 115–122.
- 137 Liang, X., X. Chen, Y. Hong, H. Liu, G. Zhou *et al.*, 2009a Utility of EST-derived SSR in  
138 cultivated peanut (*Arachis hypogaea* L.) and *Arachis* wild species. BMC Plant Biol. 9:  
139 35.
- 140 Liang, X., G. Zhou, Y. Hong, X. Chen, H. Liu *et al.*, 2009b Overview of research progress  
141 on peanut (*Arachis hypogaea* L.) host resistance to aflatoxin contamination and  
142 genomics at the Guangdong Academy of Agricultural Sciences. Peanut Sci. 36: 29–34.
- 143 Liu, N., H. Chen, D. Huai, F. Xia, L. Huang *et al.*, 2019 Four QTL clusters containing major  
144 and stable QTLs for saturated fatty acid contents in a dense genetic map of cultivated  
145 peanut (*Arachis hypogaea* L.). Mol. Breed. 39: 23.
- 146 Luo, H., J. Guo, X. Ren, W. Chen, L. Huang *et al.*, 2018 Chromosomes A07 and A05  
147 associated with stable and major QTLs for pod weight and size in cultivated peanut  
148 (*Arachis hypogaea* L.). Theor. Appl. Genet. 131: 267–282.
- 149 Luo, H., X. Ren, Z. Li, Z. Xu, X. Li *et al.*, 2017 Co-localization of major quantitative trait  
150 loci for pod size and weight to a 3.7 cM interval on chromosome A05 in cultivated  
151 peanut (*Arachis hypogaea* L.). BMC Genomics 18: 58.
- 152 Madani, A., A. S. Rad, A. Pazoki, G. Nourmohammadi, and R. Zarghami, 2010 Wheat  
153 (*Triticum aestivum* L.) grain filling and dry matter partitioning responses to source:sink  
154 modifications under postanthesis water and nitrogen deficiency. Acta Sci. Agron. Mar.

- 155 32: 145–151.
- 156 Mahon, J. D., and S. L. A. Hobbs, 1983 Variability in pod filling characteristics of peas  
157 (*Pisum sativum* L.) under field conditions. *Can. J. Plant Sci.* 63: 283–291.
- 158 Minitab® 17 Statistical Software, 2010 State College, PA: Minitab Inc. Available at:  
159 <http://www.minitab.com>.
- 160 Moretzsohn, M. C., A. V. G. Barbosa, D. M. T. Alves-Freitas, C. Teixeira, S. C. M. Leal-  
161 Bertioli *et al.*, 2009 A linkage map for the B-genome of *Arachis* (Fabaceae) and its  
162 synteny to the A-genome. *BMC Plant Biol.* 9: 40.
- 163 Moretzsohn, M. C., E. G. Gouvea, P. W. Inglis, S. C. M. Leal-Bertioli, J. F. M. Valls *et al.*,  
164 2013 A study of the relationships of cultivated peanut (*Arachis hypogaea*) and its most  
165 closely related wild species using intron sequences and microsatellite markers. *Ann.*  
166 *Bot.* 111: 113–126.
- 167 Nagy, E. D., Y. Guo, S. Tang, J. E. Bowers, R. A. Okashah *et al.*, 2012 A high-density  
168 genetic map of *Arachis duranensis*, a diploid ancestor of cultivated peanut. *BMC*  
169 *Genomics* 13: 469.
- 170 Nielen, S., B. S. Vidigal, S. C. M. Leal-Bertioli, M. Ratnaparkhe, A. H. Paterson *et al.*, 2012  
171 *Matita*, a new retroelement from peanut: characterization and evolutionary context in  
172 the light of the *Arachis* A–B genome divergence. *Mol. Genet. Genomics* 287: 21–38.
- 173 Van Ooijen, J. W., 2006 JoinMap 4 ® Software for the calculation of genetic linkage maps  
174 in experimental populations. Available at: <http://comp.uark.edu/>.
- 175 Ozias-Akins, P., E. K. S. Cannon, and S. B. Cannon, 2017 Genomics resources for peanut  
176 improvement, pp. 1–23 in *The Peanut Genome. Compendium of Plant Genomes.*, edited

- 177 by R. K. Varshney. Springer International Publishing, Springer, Cham.
- 178 Pandey, M. K., G. Agarwal, S. M. Kale, J. Clevenger, S. N. Nayak *et al.*, 2017 Development  
179 and evaluation of a high density genotyping ‘Axiom\_Arachis’ Array with 58 K SNPs  
180 for accelerating genetics and breeding in groundnut. *Sci. Rep.* 7: 40577.
- 181 Pandey, M. K., H. D. Upadhyaya, A. Rathore, V. Vadez, M. S. Sheshshayee *et al.*, 2014  
182 Genomewide association studies for 50 agronomic traits in peanut using the “reference  
183 set” comprising 300 genotypes from 48 countries of the semi-arid tropics of the world.  
184 *PLoS One* 9: e105228.
- 185 Rasband, W., 2011 Image J, U. S. National Institutes of Health, Bethesda, Maryland, USA.  
186 Available at: <http://rsb.info.nih.gov/ij>.
- 187 Ravi, K., V. Vadez, S. Isobe, R. R. Mir, Y. Guo *et al.*, 2010 Identification of several small  
188 main-effect QTLs and a large number of epistatic QTLs for drought tolerance related  
189 traits in groundnut (*Arachis hypogaea* L.). *Theor. Appl. Genet.* 122: 1119–1132.
- 190 Robledo, G., G. I. Lavia, and G. Seijo, 2009 Species relations among wild *Arachis* species  
191 with the A genome as revealed by FISH mapping of rDNA loci and heterochromatin  
192 detection. *Theor. Appl. Genet.* 118: 1295–1307.
- 193 Robledo, G., and G. Seijo, 2010 Species relationships among the wild B genome of *Arachis*  
194 species (section *Arachis*) based on FISH mapping of rDNA loci and heterochromatin  
195 detection: a new proposal for genome arrangement. *Theor. Appl. Genet.* 121: 1033–  
196 1046.
- 197 Rucker, K. S., C. K. Kvien, K. Calhoun, R. J. Henning, P. E. Koehler *et al.*, 1994a Sorting  
198 peanuts by pod density to improve quality and kernel maturity distribution and to

- 199        reduce aflatoxin. *Peanut Sci.* 21: 147–152.
- 200        Rucker, K. S., C. K. Kvien, G. Vellidis, N. S. Hill, J. K. Sharpee *et al.*, 1994b A visual  
201        method of determining maturity of shelled peanuts. *Peanut Sci.* 21: 143–146.
- 202        Samoluk, S. S., L. Chalup, G. Robledo, and J. G. Seijo, 2015 Genome sizes in diploid and  
203        allopolyploid *Arachis L.* species (section *Arachis*). *Genet. Resour. Crop Evol.* 62: 747–  
204        763.
- 205        Sanders, T. H., 1989 Maturity distribution in commercially sized Florunner peanuts. *Peanut*  
206        *Sci.* 16: 91–95.
- 207        Schweizer, P., and N. Stein, 2011 Large-scale data integration reveals colocalization of gene  
208        functional groups with meta-QTL for multiple disease resistance in barley. *Mol. Plant-*  
209        *Microbe Interact.* 24: 1492–1501.
- 210        Seijo, G., G. I. Lavia, A. Fernández, A. Krapovickas, D. A. Ducasse *et al.*, 2007 Genomic  
211        relationships between the cultivated peanut (*Arachis hypogaea*, Leguminosae) and its  
212        close relatives revealed by double GISH. *Am. J. Bot.* 94: 1963–1971.
- 213        Sharma, S. K., D. Bolser, J. de Boer, M. Sønderkær, W. Amoros *et al.*, 2013 Construction of  
214        reference chromosome-scale pseudomolecules for potato: integrating the potato genome  
215        with genetic and physical maps. *G3 Genes, Genomes, Genet.* 3: 2031–47.
- 216        Shiraiwa, T., N. Ueno, S. Shimada, and T. Horie, 2004 Correlation between yielding ability  
217        and dry matter productivity during initial seed filling stage in various soybean  
218        genotypes. *Plant Prod. Sci.* 7: 138–142.
- 219        Shirasawa, K., D. J. Bertioli, R. K. Varshney, M. C. Moretzsohn, S. C. M. Leal-Bertioli *et*  
220        *al.*, 2013 Integrated consensus map of cultivated peanut and wild relatives reveals

- 221 structures of the A and B genomes of *Arachis* and divergence of the legume genomes.  
222 DNA Res. 20: 173–84.
- 223 Shirasawa, K., P. Koilkonda, K. Aoki, H. Hirakawa, S. Tabata *et al.*, 2012 In silico  
224 polymorphism analysis for the development of simple sequence repeat and transposon  
225 markers and construction of linkage map in cultivated peanut. BMC Plant Biol. 12: 80.
- 226 Stalker, H. T., and L. G. Mazingo, 2001 Molecular Markers of *Arachis* and Marker-Assisted  
227 Selection. Peanut Sci. 117–123.
- 228 Tian, Z., C. Rizzon, J. Du, L. Zhu, J. L. Bennetzen *et al.*, 2009 Do genetic recombination and  
229 gene density shape the pattern of DNA elimination in rice long terminal repeat  
230 retrotransposons? Genome Res. 19: 2221–2230.
- 231 USDA, 1997 United States standards for grades of shelled runner type peanuts. Available at:  
232 [https://www.ams.usda.gov/sites/default/files/media/Shelled\\_Runner\\_Type\\_Peanuts\\_Standard%5B1%5D.pdf](https://www.ams.usda.gov/sites/default/files/media/Shelled_Runner_Type_Peanuts_Standard%5B1%5D.pdf). Agric. Mark. Serv. Fruit Veg. Div. 1–3.  
233
- 234 Varshney, R. K., D. J. Bertioli, M. C. Moretzsohn, V. Vadez, L. Krishnamurthy *et al.*, 2009  
235 The first SSR-based genetic linkage map for cultivated groundnut (*Arachis hypogaea*  
236 L.). Theor. Appl. Genet. 118: 729–739.
- 237 Venuprasad, R., R. Aruna, and S. N. Nigam, 2011 Inheritance of traits associated with seed  
238 size in groundnut (*Arachis hypogaea* L.). Euphytica 181: 169–177.
- 239 Voorrips, R. E., X. Chen, X. Liang, H. Liu, G. Zhou *et al.*, 2002 MapChart: Software for the  
240 graphical presentation of linkage maps and QTLs. J. Hered. 93: 77–78.
- 241 Wang, S., C. Basten, and Z.-B. Zeng, 2012 Windows QTL Cartographer 2.5. Dep. Stat.  
242 North Carolina State Univ. Raleigh, NC. Available at:



- 243 <http://statgen.ncsu.edu/qtlcart/WQTL>.
- 244 Wang, Z., D. Huai, Z. Zhang, K. Cheng, Y. Kang *et al.*, 2018a Development of a high-  
245 density genetic map based on specific length amplified fragment sequencing and its  
246 application in quantitative trait loci analysis for yield-related traits in cultivated peanut.  
247 *Front. Plant Sci.* 9: 827.
- 248 Wang, L., X. Yang, S. Cui, G. Mu, X. Sun *et al.*, 2019 QTL mapping and  
249 QTL  $\times$  environment interaction analysis of multi-seed pod in cultivated peanut (*Arachis*  
250 *hypogaea* L.). *Crop J.* 7: 249–260.
- 251 Wang, L., X. Zhou, X. Ren, L. Huang, H. Luo *et al.*, 2018b A major and stable QTL for  
252 bacterial wilt resistance on chromosome B02 identified using a high-density SNP-based  
253 genetic linkage map in cultivated peanut Yuanza 9102 derived population. *Front. Genet.*  
254 9: 652.
- 255 Williams, E. J., G. O. Ware, J.-Y. Lai, and J. S. Drexler, 1987 Effect of pod maturity and  
256 plant age on pod and seed size distributions of Florunner peanuts. *Peanut Sci.* 14: 79–  
257 83.
- 258 Wu, C., R. Gill, Y. Chu, C. C. Holbrook, and P. Ozias-Akins, 2015 Fine phenotyping of pod  
259 and seed traits in *Arachis* germplasm accessions using digital image analysis. *Peanut*  
260 *Sci.* 42: 65–73.
- 261 Wu, J., L. Wang, L. Li, and S. Wang, 2014 De novo assembly of the common bean  
262 transcriptome using short reads for the discovery of drought-responsive genes. *PLoS*  
263 *One* 9: e109262.
- 264 Zhou, X., Y. Xia, X. Ren, Y. Chen, L. Huang *et al.*, 2014 Construction of a SNP-based

265 genetic linkage map in cultivated peanut based on large scale marker development  
266 using next-generation double-digest restriction-site-associated DNA sequencing  
267 (ddRADseq). BMC Genomics 15: 351.  
268
